# Supplementary material for: Characteristics of intervention studies on family-centred care in neonatal intensive care units: a scoping review of randomised controlled trials
Source: PubMed Central journal article supplement — BMJ Paediatr Open. 2024 Jul 25;8(Suppl 2):e002469. doi: 10.1136/bmjpo-2023-002469 (PMC11664352; doi:10.1136/bmjpo-2023-002469), 2024-07-25
Supplement: bmjpo-8-Suppl_2-s001.pdf [file bmjpo-8-Suppl_2-s001.pdf]

Supplementary files for:

Characteristics of intervention studies on family-centred care in neonatal intensive care units: a scoping review of randomised controlled trials

Supplemental File 1. Preferred Reporting Items for Systematic reviews and Meta-Analyses extension for Scoping Reviews (PRISMA-ScR) Checklist\*

| SECTION                                               | ITEM | PRISMA-ScR CHECKLIST ITEM                                                                                                                                                                                                                                                                                  | REPORTED ON PAGE #  |
|-------------------------------------------------------|------|------------------------------------------------------------------------------------------------------------------------------------------------------------------------------------------------------------------------------------------------------------------------------------------------------------|---------------------|
| <b>TITLE</b>                                          |      |                                                                                                                                                                                                                                                                                                            |                     |
| Title                                                 | 1    | Identify the report as a scoping review.                                                                                                                                                                                                                                                                   | 1                   |
| <b>ABSTRACT</b>                                       |      |                                                                                                                                                                                                                                                                                                            |                     |
| Structured summary                                    | 2    | Provide a structured summary that includes (as applicable): background, objectives, eligibility criteria, sources of evidence, charting methods, results, and conclusions that relate to the review questions and objectives.                                                                              | 3                   |
| <b>INTRODUCTION</b>                                   |      |                                                                                                                                                                                                                                                                                                            |                     |
| Rationale                                             | 3    | Describe the rationale for the review in the context of what is already known. Explain why the review questions/objectives lend themselves to a scoping review approach.                                                                                                                                   | 6                   |
| Objectives                                            | 4    | Provide an explicit statement of the questions and objectives being addressed with reference to their key elements (e.g., population or participants, concepts, and context) or other relevant key elements used to conceptualize the review questions and/or objectives.                                  | 6                   |
| <b>METHODS</b>                                        |      |                                                                                                                                                                                                                                                                                                            |                     |
| Protocol and registration                             | 5    | Indicate whether a review protocol exists; state if and where it can be accessed (e.g., a Web address); and if available, provide registration information, including the registration number.                                                                                                             | 7                   |
| Eligibility criteria                                  | 6    | Specify characteristics of the sources of evidence used as eligibility criteria (e.g., years considered, language, and publication status), and provide a rationale.                                                                                                                                       | 7-9                 |
| Information sources*                                  | 7    | Describe all information sources in the search (e.g., databases with dates of coverage and contact with authors to identify additional sources), as well as the date the most recent search was executed.                                                                                                  | 7                   |
| Search                                                | 8    | Present the full electronic search strategy for at least 1 database, including any limits used, such that it could be repeated.                                                                                                                                                                            | Supplemental file 2 |
| Selection of sources of evidence†                     | 9    | State the process for selecting sources of evidence (i.e., screening and eligibility) included in the scoping review.                                                                                                                                                                                      | 8-9                 |
| Data charting process‡                                | 10   | Describe the methods of charting data from the included sources of evidence (e.g., calibrated forms or forms that have been tested by the team before their use, and whether data charting was done independently or in duplicate) and any processes for obtaining and confirming data from investigators. | 9-10                |
| Data items                                            | 11   | List and define all variables for which data were sought and any assumptions and simplifications made.                                                                                                                                                                                                     | 9-10                |
| Critical appraisal of individual sources of evidence§ | 12   | If done, provide a rationale for conducting a critical appraisal of included sources of evidence; describe the methods used and how this information was used in any data synthesis (if appropriate).                                                                                                      | -                   |
| Synthesis of results                                  | 13   | Describe the methods of handling and summarizing the data that were charted.                                                                                                                                                                                                                               | 10                  |
| <b>RESULTS</b>                                        |      |                                                                                                                                                                                                                                                                                                            |                     |
| Selection of sources of evidence                      | 14   | Give numbers of sources of evidence screened, assessed for eligibility, and included in the review, with reasons for exclusions at each stage, ideally using a flow diagram.                                                                                                                               | Figure 1            |

| SECTION                                       | ITEM | PRISMA-ScR CHECKLIST ITEM                                                                                                                                                                       | REPORTED ON PAGE #  |
|-----------------------------------------------|------|-------------------------------------------------------------------------------------------------------------------------------------------------------------------------------------------------|---------------------|
| Characteristics of sources of evidence        | 15   | For each source of evidence, present characteristics for which data were charted and provide the citations.                                                                                     | Supplemental file 4 |
| Critical appraisal within sources of evidence | 16   | If done, present data on critical appraisal of included sources of evidence (see item 12).                                                                                                      | -                   |
| Results of individual sources of evidence     | 17   | For each included source of evidence, present the relevant data that were charted that relate to the review questions and objectives.                                                           | Supplemental file 4 |
| Synthesis of results                          | 18   | Summarize and/or present the charting results as they relate to the review questions and objectives.                                                                                            | 10-16               |
| <b>DISCUSSION</b>                             |      |                                                                                                                                                                                                 |                     |
| Summary of evidence                           | 19   | Summarize the main results (including an overview of concepts, themes, and types of evidence available), link to the review questions and objectives, and consider the relevance to key groups. | 17-19               |
| Limitations                                   | 20   | Discuss the limitations of the scoping review process.                                                                                                                                          | 19                  |
| Conclusions                                   | 21   | Provide a general interpretation of the results with respect to the review questions and objectives, as well as potential implications and/or next steps.                                       | 17-18               |
| <b>FUNDING</b>                                |      |                                                                                                                                                                                                 |                     |
| Funding                                       | 22   | Describe sources of funding for the included sources of evidence, as well as sources of funding for the scoping review. Describe the role of the funders of the scoping review.                 | 20                  |

Notes: \* Where *sources of evidence* (see second footnote) are compiled from, such as bibliographic databases, social media platforms, and Web sites.

† A more inclusive/heterogeneous term used to account for the different types of evidence or data sources (e.g., quantitative and/or qualitative research, expert opinion, and policy documents) that may be eligible in a scoping review as opposed to only studies. This is not to be confused with *information sources* (see first footnote).

‡ The frameworks by Arksey and O'Malley (6) and Levac and colleagues (7) and the JBI guidance (4, 5) refer to the process of data extraction in a scoping review as data charting.

§ The process of systematically examining research evidence to assess its validity, results, and relevance before using it to inform a decision. This term is used for items 12 and 19 instead of "risk of bias" (which is more applicable to systematic reviews of interventions) to include and acknowledge the various sources of evidence that may be used in a scoping review (e.g., quantitative and/or qualitative research, expert opinion, and policy document).

\*Reference: Tricco AC, Lillie E, Zarin W, O'Brien KK, Colquhoun H, Levac D, et al. PRISMA Extension for Scoping Reviews (PRISMA-ScR): Checklist and Explanation. *Ann Intern Med.* 2018;169:467–473. doi: [10.7326/M18-0850](https://doi.org/10.7326/M18-0850).

Abbreviations: JBI = Joanna Briggs Institute; PRISMA-ScR = Preferred Reporting Items for Systematic reviews and Meta-Analyses extension for Scoping Reviews.

Supplemental File 2. Search strategy

|                                                                                                                                                                                                                                                                                                                                                                                                                                                                                                                                                                                                                                                                                                                                                                                                                                                                                                                                                                                                                                                                                                                                                                                                                                                                                                                                                                                                                                                                                                                                                                                                                                                                                                                                                                                                                                                                                                                                                                                                                                                                                                                                                                                                                                                                                                                                                                                                                                                                                                                                                                         |
|-------------------------------------------------------------------------------------------------------------------------------------------------------------------------------------------------------------------------------------------------------------------------------------------------------------------------------------------------------------------------------------------------------------------------------------------------------------------------------------------------------------------------------------------------------------------------------------------------------------------------------------------------------------------------------------------------------------------------------------------------------------------------------------------------------------------------------------------------------------------------------------------------------------------------------------------------------------------------------------------------------------------------------------------------------------------------------------------------------------------------------------------------------------------------------------------------------------------------------------------------------------------------------------------------------------------------------------------------------------------------------------------------------------------------------------------------------------------------------------------------------------------------------------------------------------------------------------------------------------------------------------------------------------------------------------------------------------------------------------------------------------------------------------------------------------------------------------------------------------------------------------------------------------------------------------------------------------------------------------------------------------------------------------------------------------------------------------------------------------------------------------------------------------------------------------------------------------------------------------------------------------------------------------------------------------------------------------------------------------------------------------------------------------------------------------------------------------------------------------------------------------------------------------------------------------------------|
| <p><b>1. PUBMED</b></p>                                                                                                                                                                                                                                                                                                                                                                                                                                                                                                                                                                                                                                                                                                                                                                                                                                                                                                                                                                                                                                                                                                                                                                                                                                                                                                                                                                                                                                                                                                                                                                                                                                                                                                                                                                                                                                                                                                                                                                                                                                                                                                                                                                                                                                                                                                                                                                                                                                                                                                                                                 |
| <p>((((((((((((((((((((((((((("Family"[Mesh]) OR (famil*) OR ("Nuclear Family"[Mesh])) OR ("Fathers"[Mesh])) OR (father*) OR (paternal)) OR ("Mothers"[Mesh])) OR (mother*) OR (maternal)) OR ("Parents"[Mesh])) OR (parent*) OR ("Siblings"[Mesh])) OR (sibling*) OR (sister*) OR (brother*) OR ("Caregivers"[Mesh])) OR (caretaker*) OR (caregiver*) OR ("Legal Guardians"[Mesh])) OR ("legal custodian*") OR ("legal tutor*") OR ("legal guardian*") OR (guardian*) OR ("spouses"[MeSH Terms])) OR (spouses) OR (couple*) OR (marital)) OR (partner)) OR (partners)) OR (kins)) OR (relatives))<br/> AND (((((((((((("Infant, Newborn"[Mesh]) OR ("Infant, Newborn, Diseases"[Mesh])) OR (newborn*) OR (new-born*) OR (neonat*) OR (infant*) OR (baby)) OR (babies)) OR (prematu*) OR (preterm*))<br/> AND (((((((((((("Intensive Care Units"[Mesh]) OR ("Intensive Care Units, Neonatal"[Mesh])) OR ("intensive care") OR (ICU)) OR (ICUs) OR (NICU) OR ("special care") OR (SCBU) OR ("neonatal unit*") OR ("neonatal unit*") OR ("Critical Care"[Mesh])) OR ("critical care") OR ("kangaroo unit*") OR ("semi-intensive"))<br/> AND (((((((((((((((((((((((((((((((intervention*) OR (environment*) OR ("Health Facility Environment"[Mesh])) OR (Health Facility Environment)) OR (Health Care Environment)) OR (reorganis*) OR (reorganiz*) OR ("Parent-Child Relations"[Mesh])) OR (interact*) OR ("Policy"[Mesh])) OR (policy) OR (policies) OR ("Family Nursing"[Mesh])) OR (family nursing)) OR (integrat*) OR (centred)) OR (centered)) OR (participat*)) OR (involv*)) OR (engage*)) OR (decision making)) OR (care decision)) OR ("partnership")) OR ("care delivery")) OR ("Patient Participation"[Mesh])) OR (collaborat*)) OR ("Communication"[Mesh])) OR (communicat*)) OR ("Education"[Mesh])) OR (educat*)) OR (lesson*) OR ("Social Support"[Mesh])) OR (support*) OR ("parent-to-parent")) OR ("Peer to peer") OR (empower*) OR ("Personal Satisfaction"[Mesh])) OR ("Patient Satisfaction"[Mesh])) OR (satisf*) OR (bond*) OR ("Stress Disorders, Traumatic"[Mesh])) OR (Stress*))<br/> AND (((((((((((("Randomized Controlled Trial" [Publication Type]) OR ("Randomized Controlled Trial*") OR ("Randomised Controlled Trial*") OR (RCT)) OR (RCTs)) OR (randomized)) OR (randomised)) OR (randomly)) OR ("Controlled Clinical Trial*") OR ("Controlled Clinical Trial" [Publication Type])) OR ("randomized Trial*") OR ("randomised Trial*") OR ("randomised clinical trial*") OR ("randomized clinical trial*"))</p> <p>Filter: humans</p> |
| <p><b>2. EMBASE</b></p>                                                                                                                                                                                                                                                                                                                                                                                                                                                                                                                                                                                                                                                                                                                                                                                                                                                                                                                                                                                                                                                                                                                                                                                                                                                                                                                                                                                                                                                                                                                                                                                                                                                                                                                                                                                                                                                                                                                                                                                                                                                                                                                                                                                                                                                                                                                                                                                                                                                                                                                                                 |
| <p>("Family"/exp OR famil* OR "Father"/exp OR father* OR paternal OR "Mother"/exp OR mother* OR maternal OR parent* OR sibling* OR sister* OR brother* OR "Caregiver"/exp OR caretaker* OR caregiver* OR "Legal Guardian"/exp OR "legal custodian*" OR "legal tutor*" OR "legal guardian*" OR guardian* OR spouses OR couple* OR marital OR partner OR partners OR kins OR relatives)<br/> AND ("Infant"/exp OR newborn* OR new-born* OR neonat* OR infant* OR baby OR babies OR prematu* OR preterm*)<br/> AND ("Intensive Care"/exp OR "intensive care" OR ICU OR ICUs OR NICU OR "special care" OR SCBU OR "neonatal unit*" OR "neonatal unit*" OR "critical care" OR "kangaroo unit*" OR "semi-intensive")<br/> AND (intervention* OR environment* OR Health Facility Environment OR Health Care Environment OR reorganis* OR reorganiz* OR "child parent relation"/exp OR interact* OR "Policy"/exp OR policy OR policies OR "Family Nursing"/exp OR family nursing OR integrat* OR centred OR centered OR participat* OR involv* OR engage* OR decision making OR care decision OR "partnership" OR "care delivery" OR "Patient Participation"/exp OR collaborat* OR "interpersonal communication"/exp OR communicat* OR "Education"/exp OR educat* OR lesson* OR "Social Support"/exp OR support* OR "parent-to-parent" OR "Peer to peer" OR empower* OR "Satisfaction"/exp OR satisf* OR bond* OR "physiological Stress"/exp OR Stress*)<br/> AND ("Randomized Controlled Trial"/exp OR "Randomized Controlled Trial*" OR "Randomised Controlled Trial*" OR RCT OR RCTs OR randomized OR randomised OR randomly OR "Controlled Clinical Trial*" OR "Controlled Clinical Trial"/exp OR "randomized Trial*" OR "randomised Trial*" OR "randomised clinical trial*" OR "randomized clinical trial*")</p>                                                                                                                                                                                                                                                                                                                                                                                                                                                                                                                                                                                                                                                                                                                                                           |

### 3. COCHRANE LIBRARY

(famil\* OR father\* OR paternal OR mother\* OR maternal OR parent\* OR sibling\* OR sister\* OR brother\* OR caretaker\* OR caregiver\* OR "legal custodian\*" OR "legal tutor\*" OR "legal guardian\*" OR guardian\* OR spouses OR couple\* OR marital OR partner OR partners OR kins OR relatives)  
AND ((newborn\* OR new-born\* OR neonat\* OR infant\* OR baby OR babies OR prematur\* OR preterm\* )  
AND ("intensive care" OR ICU OR ICUs OR NICU OR "special care" OR SCBU OR "neonatal unit\*" OR "neonatal unit\*" OR "critical care" OR "kangaroo unit\*" OR "semi-intensive"))  
AND (intervention\* OR environment\* OR "Health Facility Environment" OR "Health Care Environment" OR reorganis\* OR reorganiz\* OR "child parent relation" OR interact\* OR policy OR policies OR "family nursing" OR integrat\* OR centred OR centered OR participat\* OR involv\* OR engage\* OR "decision making" OR "care decision" OR "partnership" OR "care delivery" OR collaborat\* OR communicat\* OR educat\* OR lesson\* OR support\* OR "parent-to-parent" OR "Peer to peer" OR empower\* OR satisf\* OR bond\* OR Stress\*)  
AND ("Randomized Controlled Trial\*" OR "Randomised Controlled Trial\*" OR "RCT" OR "RCTs" OR randomized OR randomised OR randomly OR "Controlled Clinical Trial\*" OR "randomized Trial\*" OR "randomised Trial\*" OR "randomised clinical trial\*" OR "randomized clinical trial\*")

### 4. WEB OF SCIENCE

famil\* OR father\* OR paternal OR mother\* OR maternal OR parent\* OR sibling\* OR sister\* OR brother\* OR caretaker\* OR caregiver\* OR "legal custodian\*" OR "legal tutor\*" OR "legal guardian\*" OR guardian\* OR spouses OR couple\* OR marital OR partner OR partners OR king OR relatives (All Fields) and  
((newborn\* OR new-born\* OR neonat\* OR infant\* OR baby OR babies OR prematur\* OR preterm\* ) AND  
("intensive care" OR ICU OR ICUs OR NICU OR "special care" OR scab OR "neonatal unit\*" OR "neonatal unit\*" OR "critical care" OR "kangaroo unit\*" OR "semi-intensive")) (All Fields) and  
intervention\* OR environment\* OR "Health Facility Environment" OR "Health Care Environment" OR reorganis\* OR reorganiz\* OR "child parent relation" OR interact\* OR policy OR policies OR "family nursing" OR integrat\* OR centred OR centered OR participat\* OR involv\* OR engage\* OR "decision making" OR "care decision" OR "partnership" OR "care delivery" OR collaborat\* OR communicat\* OR educat\* OR lesson\* OR support\* OR "parent-to-parent" OR "Peer to peer" OR empower\* OR satisf\* OR bond\* OR Stress\* (All Fields) and  
"Randomized Controlled Trial\*" OR "Randomised Controlled Trial\*" OR "RCT" OR "RCTs" OR randomized OR randomised OR randomly OR "Controlled Clinical Trial\*" OR "randomized Trial\*" OR "randomised Trial\*" OR "randomised clinical trial\*" OR "randomized clinical trial\*" (All Fields)

### Supplemental File 3. List of included studies

|                           |                                                                                                                                                                                                                                                                                                                                                                                                                 |
|---------------------------|-----------------------------------------------------------------------------------------------------------------------------------------------------------------------------------------------------------------------------------------------------------------------------------------------------------------------------------------------------------------------------------------------------------------|
| Abdel Latif 2015          | Abdel Latif 2015: Abdel-Latif ME, Boswell D, Broom M, et al Parental presence on neonatal intensive care unit clinical bedside rounds: randomised trial and focus group discussion Archives of Disease in Childhood - Fetal and Neonatal Edition 2015;100:F203-F209.                                                                                                                                            |
| Affleck 1989              | Affleck G, Tennen H, Rowe J, Roscher B, Walker L. Effects of formal support on mothers' adaptation to the hospital-to-home transition of high-risk infants: the benefits and costs of helping. Child Dev. 1989 Apr;60(2):488-501. doi: 10.1111/j.1467-8624.1989.tb02730.x. PMID: 2494024.                                                                                                                       |
| Al-Maghaireh 2020         | Al-Maghaireh, D.F., Khalaf, I.A., Abdullah, K.L., Chan, C.M., Basyoun, N.R., & Kawafha, M.M. (2020). The effect of an emotional support training program on acute stress disorder among mothers of preterm infants hospitalized in neonatal intensive care units. Journal of Neonatal Nursing, 26, 273-277. <a href="https://doi.org/10.1016/j.jnn.2020.06.003">https://doi.org/10.1016/j.jnn.2020.06.003</a> . |
| Alijanzadeh Zaferani 2021 | Alijanzadeh Zaferani, S. F., Zabihi, A., Jafarian-Amiri, S. R., Akbarian-Rad, Z., & Hajian, K. A. (2021). Evaluating the Effect of Positive Touch on Moods of Mothers of Premature Infants Hospitalized in NICU: A Randomized Clinical Trial. Iranian Journal of Psychiatry and Behavioral Sciences, 15(3). doi:10.5812/ijpbs.109251                                                                            |
| Als 1994                  | Als H, Lawhon G, Duffy FH, McAnulty GB, Gibes-Grossman R, Blickman JG. Individualized developmental care for the very low-birth-weight preterm infant. Medical and neurofunctional effects. JAMA. 1994 Sep 21;272(11):853-8. PMID: 8078162.                                                                                                                                                                     |
| Als 2003                  | Als H, Gilkerson L, Duffy FH, McAnulty GB, Buehler DM, Vandenberg K, Jones KJ. A three-center, randomized, controlled trial of individualized developmental care for very low birth weight preterm infants: Medical, neurodevelopmental, parenting, and caregiving effects. Journal of Developmental & Behavioral Pediatrics. 2003; 24(6):399–408.                                                              |
| Als 2004                  | Als H, Duffy FH, McAnulty GB, Rivkin MJ, Vajapeyam S, Mulkern RV, Warfield SK, Huppi PS, Butler SC, Conneman N, Fischer C, Eichenwald EC. Early experience alters brain function and structure. Pediatrics. 2004 Apr;113(4):846-57. doi: 10.1542/peds.113.4.846. PMID: 15060237.                                                                                                                                |
| Als 2011                  | Als H, Duffy FH, McAnulty GB, et al. (2011) Is the newborn individualized developmental care and assessment program (NIDCAP) effective for preterm infants with intrauterine growth restriction? Journal of Perinatology 31: 130–136. (NIDCAP)                                                                                                                                                                  |
| Als 2012                  | Als 2012: Als H, Duffy FH, McAnulty G, Butler SC, Lightbody L, Kosta S, Weisenfeld NI, Robertson R, Parad RB, Ringer SA, Blickman JG, Zurakowski D, Warfield SK. NIDCAP improves brain function and structure in preterm infants with severe intrauterine growth restriction. J Perinatol. 2012 Oct;32(10):797-803. doi: 10.1038/jp.2011.201. Epub 2012 Feb 2. PMID: 22301525; PMCID: PMC3461405.               |
| Andrews 2020              | Andrews KG, Martin MW, Shenberger E, Pereira S, Fink G, McConnell M. Financial Support to Medicaid-Eligible Mothers Increases Caregiving for Preterm Infants. Matern Child Health J. 2020 May;24(5):587-600. doi: 10.1007/s10995-020-02905-7. PMID: 32277384.                                                                                                                                                   |
| Ariagno 1997              | Ariagno RL, Thoman EB, Boeddiker MA, Kugener B, Constantinou JC, Mirmiran M, Baldwin RB. Developmental care does not alter sleep and development of premature infants. Pediatrics. 1997 Dec;100(6):E9. doi: 10.1542/peds.100.6.e9. PMID: 9382910.                                                                                                                                                               |

|                   |                                                                                                                                                                                                                                                                                                                                                                                                                                                                                                                                      |
|-------------------|--------------------------------------------------------------------------------------------------------------------------------------------------------------------------------------------------------------------------------------------------------------------------------------------------------------------------------------------------------------------------------------------------------------------------------------------------------------------------------------------------------------------------------------|
| Bastani 2015      | Bastani F, Abadi TA, Haghani H. Effect of family-centered care on improving parental satisfaction and reducing readmission among premature infants: a randomized controlled trial. <i>J Clin Diagn Res</i> 2015;9(1):SC04e8.                                                                                                                                                                                                                                                                                                         |
| Beebe 2018        | Beebe B, Myers MM, Lee SH, Lange A, Ewing J, Rubinchik N, Andrews H, Austin J, Hane A, Margolis AE, Hofer M, Ludwig RJ, Welch MG. Family nurture intervention for preterm infants facilitates positive mother-infant face-to-face engagement at 4 months. <i>Dev Psychol.</i> 2018 Nov;54(11):2016-2031. doi: 10.1037/dev0000557.                                                                                                                                                                                                    |
| Beheshtipour 2014 | Beheshtipour N, Baharlu SM, Montaseri S, RazavinezhadArdakani SM. The effect of the educational program on Iranian premature infants' parental stress in a neonatal intensive care unit: a double-blind randomized controlled trial. <i>Int J Community Based Nurs Midwifery</i> 2014, 2(4): 240-250                                                                                                                                                                                                                                 |
| Benzies 2020      | Benzies KM, Aziz K, Shah V, Faris P, Isaranuwatthai W, Scotland J, Larocque J, Mrklas KJ, Naugler C, Stelfox HT, Chari R, Soraisham AS, Akierman AR, Phillipos E, Amin H, Hoch JS, Zanoni P, Kurilova J, Lodha A; Alberta FiCare Level II NICU Study Team. Effectiveness of Alberta Family Integrated Care on infant length of stay in level II neonatal intensive care units: a cluster randomized controlled trial. <i>BMC Pediatr.</i> 2020 Nov 28;20(1):535. doi: 10.1186/s12887-020-02438-6. PMID: 33246430; PMCID: PMC7697372. |
| Bernard 2011      | Bernard RS, Williams SE, Storfer-Isser A, Rhine W, Horwitz SM, Koopman C, Shaw RJ. Brief cognitive-behavioral intervention for maternal depression and trauma in the neonatal intensive care unit: A pilot study. <i>Journal of Traumatic Stress.</i> 2011; 24(2):230–234.                                                                                                                                                                                                                                                           |
| Borghini 2014     | Borghini A, Habersaat S, Forcada-Guex M, Nessi J, Pierrehumbert B, Ansermet F, et al. Effects of an early intervention on maternal post-traumatic stress symptoms and the quality of mother–infant interaction: The case of preterm birth. <i>Infant Behavior &amp; Development</i> 2014, 37(4): 624-631.                                                                                                                                                                                                                            |
| Brisch 2003       | Brisch KH, Bechinger D, Betzler S, Heinemann H. Early preventive attachment-oriented psychotherapeutic intervention program with parents of a very low birthweight premature infant: results of attachment and neurological development. <i>Attachment &amp; Human Development.</i> 2003; 5(2):120–135.                                                                                                                                                                                                                              |
| Browne 2005       | Browne JV, Talmi A (2005) Family-based intervention to enhance infant parent relationships in the neonatal intensive care unit. <i>J Pediatr Psychol</i> 30:667–677.                                                                                                                                                                                                                                                                                                                                                                 |
| Campbell-Yeo 2021 | Campbell-Yeo M, Kim T, Disher T, Richardson B, Dol J, Bishop T, Delahunty-Pike A, Dorling J, Glover M, Inglis D, Johnson T, Macmillan D, Mcgrath P, Monaghan J, Orovec A, Simpson DC, Skinner N, Whitehead L, Wozney L; Chez NICU Home team in alphabetical order. Do Single-Family Rooms Increase Parental Presence, Involvement, and Maternal Well-Being in Neonatal Intensive Care? <i>J Perinat Neonatal Nurs.</i> 2021 Oct-Dec 01;35(4):350-361. doi: 10.1097/JPN.0000000000000600. PMID: 34726653.                             |
| Chen 2013         | Chen LC, Wu YC, Hsieh WS, Hsu CH, Leng CH, Chen WJ, et al. The effect of in-hospital developmental care on neonatal morbidity, growth and development of preterm Taiwanese infants: a randomized controlled trial. <i>Early Hum Dev</i> 2013;89(5):301e6.                                                                                                                                                                                                                                                                            |
| Cheng 2019        | Cheng C., Linda S. Franck, Xiang Y. Ye, Sarah A. Hutchinson, Shoo K. Lee & Karel O’Brien on behalf of the FiCare Study Group and FiCare Parent Advisory Board (2019): Evaluating the effect of Family Integrated Care on maternal stress and anxiety in neonatal intensive care units, <i>Journal of Reproductive and Infant Psychology</i> , DOI: 10.1080/02646838.2019.1659940                                                                                                                                                     |

|                     |                                                                                                                                                                                                                                                                                                                                                                                                                           |
|---------------------|---------------------------------------------------------------------------------------------------------------------------------------------------------------------------------------------------------------------------------------------------------------------------------------------------------------------------------------------------------------------------------------------------------------------------|
| Church 2020         | Church PT, Grunau RE, Mirea L, Petrie J, Soraisham AS, Synnes A, Ye XY, O'Brien K. Family Integrated Care (FICare): Positive impact on behavioural outcomes at 18 months. <i>Early Hum Dev.</i> 2020 Dec;151:105196. doi: 10.1016/j.earlhumdev.2020.105196.                                                                                                                                                               |
| Clarke-pounder 2014 | Clarke-pounder JP, Boss RD, Roter DL, Hutton N, Larson S, Donohue PK. Communication intervention in the neonatal intensive care unit: can it backfire? <i>J Palliat Med</i> 2014;18(2):157e61.                                                                                                                                                                                                                            |
| Cobiella 1990       | Cobiella CW, Mabe PA, Forehand RL. A comparison of two stress-reduction treatments for mothers of neonates hospitalized in a neonatal intensive care unit. <i>Children's Health Care.</i> 1990;19:93-100.                                                                                                                                                                                                                 |
| Colditz 2019        | Colditz PB, Boyd RN, Winter L, Pritchard M, Gray PH, Whittingham K, O'Callaghan M, Jardine L, O'Rourke P, Marquart L, Forrest K, Spry C, Sanders MR. A Randomized Trial of Baby Triple P for Preterm Infants: Child Outcomes at 2 Years of Corrected Age. <i>J Pediatr.</i> 2019 Jul;210:48-54.e2. doi: 10.1016/j.jpeds.2019.01.024. Epub 2019 Mar 8. PMID: 30857773.                                                     |
| Dusing 2015         | Dusing SC, Brown SE, Van Drew CM, Thacker LR, Hendricks-Muñoz KD. Supporting Play Exploration and Early Development Intervention From NICU to Home: A Feasibility Study. <i>Pediatr Phys Ther.</i> 2015 Fall;27(3):267-74. doi: 10.1097/PEP.000000000000161. PMID: 26102168.                                                                                                                                              |
| Dusing 2018         | Dusing SC, Tripathi T, Marcinowski EC, Thacker LR, Brown LF, Hendricks-Muñoz KD. Supporting play exploration and early developmental intervention versus usual care to enhance development outcomes during the transition from the neonatal intensive care unit to home: a pilot randomized controlled trial. <i>BMC Pediatr.</i> 2018 Feb 9;18(1):46. doi: 10.1186/s12887-018-1011-4. PMID: 29426320; PMCID: PMC5809115. |
| Feeley 2012         | Feeley N, Zekowitz P, Shrier I, Stremler R, Westreich R, Dunkley D, et al. Follow-up of the Cues and Care Trial: mother and infant outcomes at 6 months. <i>Journal of Early Intervention</i> 2012, 34(2): 65-81.                                                                                                                                                                                                         |
| Finlayson 2020      | Finlayson F, Olsen J, Dusing SC, Guzzetta A, Eeles A, Spittle A. Supporting Play, Exploration, and Early Development Intervention (SPEEDI) for preterm infants: A feasibility randomised controlled trial in an Australian context. <i>Early Hum Dev.</i> 2020 Dec;151:105172. doi: 10.1016/j.earlhumdev.2020.105172. Epub 2020 Sep 1. PMID: 33137579                                                                     |
| Fontana 2018        | Fontana C, Menis C, Pesenti N, Passera S, Liotto N, Mosca F, Roggero P, Fumagalli M. Effects of early intervention on feeding behavior in preterm infants: A randomized controlled trial. <i>Early Hum Dev.</i> 2018 Jun;121:15-20. doi: 10.1016/j.earlhumdev.2018.04.016. Epub 2018 May 3. PMID: 29730130.                                                                                                               |
| Fontana 2020        | Fontana C, De Carli A, Ricci D, Dessimone F, Passera S, Pesenti N, Bonzini M, Bassi L, Squarcina L, Cinnante C, Mosca F, Fumagalli M. Effects of Early Intervention on Visual Function in Preterm Infants: A Randomized Controlled Trial. <i>Front Pediatr.</i> 2020 Jun 4;8:291. doi: 10.3389/fped.2020.00291. PMID: 32582595; PMCID: PMC7287146.                                                                        |
| Fontana 2021        | Fontana C, Marasca F, Provitera L, Mancinelli S, Pesenti N, Sinha S, Passera S, Abrignani S, Mosca F, Lodato S, Bodega B, Fumagalli M. Early maternal care restores LINE-1 methylation and enhances neurodevelopment in preterm infants. <i>BMC Med.</i> 2021 Feb 5;19(1):42. doi: 10.1186/s12916-020-01896-0. PMID: 33541338; PMCID: PMC7863536.                                                                         |



|                     |                                                                                                                                                                                                                                                                                                                                                                                                                            |
|---------------------|----------------------------------------------------------------------------------------------------------------------------------------------------------------------------------------------------------------------------------------------------------------------------------------------------------------------------------------------------------------------------------------------------------------------------|
| Fotiou 2016         | Fotiou 2016: Fotiou C, Vlastarakos PV, Bakoula C, Papagaroufalas K, Bakoyannis G, Darviri C, Chrousos G. Parental stress management using relaxation techniques in a neonatal intensive care unit: A randomised controlled trial. <i>Intensive Crit Care Nurs.</i> 2016 Feb;32:20-8. doi: 10.1016/j.iccn.2015.08.006. PMID: 26520208.                                                                                      |
| Garfield 2016       | Garfield CF, Lee YS, Kim HN, Rutsohn J, Kahn JY, Mustanski B, Mohr DC. Supporting Parents of Premature Infants Transitioning from the NICU to Home: A Pilot Randomized Control Trial of a Smartphone Application. <i>Internet Interv.</i> 2016 May;4(Pt 2):131-137. doi: 10.1016/j.invent.2016.05.004. Epub 2016 Jun 4.                                                                                                    |
| Glazebrook 2007     | Glazebrook C, Marlow N, Israel C, Croudace T, Johnson S, White IR, et al. Randomized trial of a parenting intervention during neonatal intensive care. <i>Arch Dis Child Fetal Neonatal Ed</i> 2007;92(6):438e43.                                                                                                                                                                                                          |
| Gray 2000           | Gray JE, Safran C, Davis RB, Pompilio-Weitzner G, Stewart JE, Zaccagnini L, Pursley D. Baby CareLink: using the internet and telemedicine to improve care for high-risk infants. <i>Pediatrics.</i> 2000 Dec;106(6):1318-24. doi: 10.1542/peds.106.6.1318. PMID: 11099583.                                                                                                                                                 |
| Hane 2015           | Hane AA, Myers MM, Hofer MA, Ludwig RJ, Halperin MS, Austin J, Glickstein SB, Welch MG. Family nurture intervention improves the quality of maternal caregiving in the neonatal intensive care unit: evidence from a randomized controlled trial. <i>J Dev Behav Pediatr.</i> 2015 Apr;36(3):188-96. doi: 10.1097/DBP.000000000000148. PMID: 25757070.                                                                     |
| Harrison 1986       | Harrison LL, Twardosz S. Teaching mothers about their preterm infants. <i>J Obstet Gynecol Neonatal Nurs.</i> 1986 Mar-Apr;15(2):165-72. doi: 10.1111/j.1552-6909.1986.tb01384.x.                                                                                                                                                                                                                                          |
| Hauglann 2015       | Hauglann L, Handegaard BH, Ulvund SE, Nordhov M, Rønning JA, Kaarensen PI. Cognitive outcome of early intervention in preterms at 7 and 9 years of age: a randomised controlled trial. <i>Arch Dis Child Fetal Neonatal Ed.</i> 2015 Jan;100(1):F11-6. doi: 10.1136/archdischild-2014-306496. Epub 2014 Sep 23. PMID: 25249191.                                                                                            |
| Hei 2021            | Hei M, Gao X, Li Y, Gao X, Li Z, Xia S, Zhang Q, Han S, Gao H, Nong S, Zhang A, Li J, Wang Y, Ye XY, Lee SK. Family Integrated Care for Preterm Infants in China: A Cluster Randomized Controlled Trial. <i>J Pediatr.</i> 2021 Jan;228:36-43.e2. doi: 10.1016/j.jpeds.2020.09.006.                                                                                                                                        |
| Heo 2019            | Yoo Jin Heo, Won-Oak Oh, The effectiveness of a parent participation improvement program for parents on partnership, attachment infant growth in a neonatal intensive care unit: A randomized controlled trial, <i>International Journal of Nursing Studies</i> , Volume 95,2019, Pages 19-27, ISSN 0020-7489, <a href="https://doi.org/10.1016/j.ijnurstu.2019.03.018">https://doi.org/10.1016/j.ijnurstu.2019.03.018</a> |
| Hoffenkamp 2015     | Hoffenkamp HN, Tooten A, Hall RA, Braeken J, Eliëns MP, Vingerhoets AJ, van Bakel HJ. Effectiveness of hospital-based video interaction guidance on parental interactive behavior, bonding, and stress after preterm birth: A randomized controlled trial. <i>J Consult Clin Psychol.</i> 2015 Apr;83(2):416-29.                                                                                                           |
| Holditch-Davis 2013 | Holditch-Davis D, White-Traut R, Levy J, Williams KL, Ryan D, Vonderheid S. Maternal satisfaction with administering infant interventions in the neonatal intensive care unit. <i>J Obstet Gynecol Neonatal Nurs.</i> 2013 Nov-Dec;42(6):641-54. doi: 10.1111/1552-6909.12255. PMID: 25803213; PMCID: PMC4531372.                                                                                                          |

|                     |                                                                                                                                                                                                                                                                                                                                                                                                                                 |
|---------------------|---------------------------------------------------------------------------------------------------------------------------------------------------------------------------------------------------------------------------------------------------------------------------------------------------------------------------------------------------------------------------------------------------------------------------------|
| Holditch-Davis 2014 | Holditch-Davis D, White-Traut RC, Levy JA, O'Shea TM, Geraldo V, David RJ. Maternally administered interventions for preterm infants in the NICU: effects on maternal psychological distress and mother–infant relationship. <i>Infant Behav Dev.</i> 2014;37:695-710.                                                                                                                                                          |
| Horwitz 2015        | Horwitz SM, Leibovitz A, Lilo E, Jo B, Debattista A, St John N, Shaw RJ. Does an intervention to reduce maternal anxiety, depression and trauma also improve mothers' perceptions of their preterm infants' vulnerability? <i>Infant Ment Health J.</i> 2015 Jan-Feb;36(1):42-52. doi: 10.1002/imhj.21484. Epub 2014 Dec 1. Erratum in: <i>Infant Ment Health J.</i> 2015 May-Jun;36(3):352. PMID: 25452159; PMCID: PMC4413008. |
| Jafarzadeh 2019     | Jafarzadeh Z, Maghsoudi, J., Barekatin, B., Marofi, M. Effect of Telenursing on Attachment and Stress in Mothers of Preterm Infants. <i>Iranian Journal of Neonatology IJN</i> , 2019; 10(1): 65-71. doi: 10.22038/ijn.2018.29890.1406                                                                                                                                                                                          |
| Johnson 2009        | Johnson S, Whitelaw A, Glazebrook C, Israel C, Turner R, White IR, Croudace T, Davenport F, Marlow N. Randomized trial of a parenting intervention for very preterm infants: outcome at 2 years. <i>J Pediatr.</i> 2009 Oct;155(4):488-94. doi: 10.1016/j.jpeds.2009.04.013.                                                                                                                                                    |
| Kaaresen 2006       | Kaaresen PI, Ronning JA, Ulvund SE, Dahl LB. A randomized, controlled trial of the effectiveness of an early-intervention program in reducing parenting stress after preterm birth. <i>Pediatrics</i> 2006, 118(1): e9-19.                                                                                                                                                                                                      |
| Kaaresen 2008       | Kaaresen PI, Rønning JA, Tunby J, Nordhov SM, Ulvund SE, Dahl LB. A randomized controlled trial of an early intervention program in low birth weight children: outcome at 2 years. <i>Early Hum Dev.</i> 2008 Mar;84(3):201-9. doi: 10.1016/j.earlhumdev.2007.07.003. Epub 2007 Aug 14. PMID: 17698301.                                                                                                                         |
| Kachoosangy 2020    | Askary Kachoosangy R, Shafaroodi N, Heidarzadeh M, Qorbani M, Bordbbr A, Hejazi Shirmard M, Daneshjoo F. Increasing Mothers' Confidence and Ability by Creating Opportunities for Parent Empowerment (COPE): A Randomized, Controlled Trial. <i>Iran J Child Neurol.</i> 2020 Winter;14(1):77-83. PMID: 32021631; PMCID: PMC6956963                                                                                             |
| Kang 1995           | Kang R, Barnard K, Hammond M, Oshio S, Spencer C, Thibodeaux B, Williams J: Preterm infant follow-up project: A multi-site field experiment of hospital and home intervention programs for mothers and preterm infants. <i>Public Health Nurs</i> 1995, 12(3):171-180.                                                                                                                                                          |
| Karbandi 2015       | Karbandi S, Momenizade A, Heydarzade M, Mazlom S, Hassanzade M. Effects of Maternal Empowerment Program on the Length of Hospitalization and Readmission Rate of Premature Infants. <i>JBUMS.</i> 2015; 17 (10) :28-33                                                                                                                                                                                                          |
| Kleberg 2002        | Kleberg A, Westrup B, Stjernqvist K, Lagercrantz H. (2002) Indications of improved cognitive development at one year of age among infants born very prematurely who received care based on the Newborn Individualized Developmental Care and Assessment Program (NIDCAP). <i>Early Hum Dev</i> 68: 83–91.                                                                                                                       |
| Koldewijn 2009      | Koldewijn K, Wolf MJ, van Wassenaer A, et al. (2009) The infant behavioral assessment and intervention program for very low birth weight infants at 6 months corrected age. <i>Journal of Pediatrics</i> 154: 33–38.                                                                                                                                                                                                            |
| Koldewijn 2010      | Koldewijn K, van Wassenaer A, Wolf MJ, et al. (2010) A neurobehavioral intervention and assessment program in very low birth weight infants: outcome at 24 months. <i>Journal of Pediatrics</i> 156: 359–365.                                                                                                                                                                                                                   |
| Kynø 2012           | Kynø NM, Ravn IH, Lindemann R, Fagerland MW, Smeby NA, Torgersen AM. Effect of an early intervention program on development of moderate and late preterm infants at 36 months: a randomized controlled study. <i>Infant Behav Dev.</i> 2012;35(4):916–926.                                                                                                                                                                      |

|                 |                                                                                                                                                                                                                                                                                                                                                                                                                                 |
|-----------------|---------------------------------------------------------------------------------------------------------------------------------------------------------------------------------------------------------------------------------------------------------------------------------------------------------------------------------------------------------------------------------------------------------------------------------|
| Landsem 2014    | Landsem IP, Handegard BH, Tunby J, Ulvund SE, Ronning JA. Early intervention program reduces stress in parents of preterms during childhood, a randomized controlled trial. <i>Trials</i> 2014, 15: 387.                                                                                                                                                                                                                        |
| Lee 2019        | Lee SY, Chau JPC, Choi KC, Lo SHS. Feasibility of a guided participation discharge program for very preterm infants in a neonatal intensive care unit: a randomized controlled trial. <i>BMC Pediatr.</i> 2019 Nov 4;19(1):402. doi: 10.1186/s12887-019-1794-y. PMID: 31684903; PMCID: PMC6827218.                                                                                                                              |
| Maguire 2009    | Maguire CM, Walther FJ, Sprij AJ, et al. (2009) Effects of individualized developmental care in a randomized trial of preterm infants < 32 weeks. <i>Pediatrics</i> 124(4): 1021–1030. (NIDCAP)                                                                                                                                                                                                                                 |
| Matricardi 2013 | Matricardi S, Agostino R, Fedeli C, Montirosso R. Mothers are not fathers: differences between parents in the reduction of stress levels after a parental intervention in a NICU. <i>Acta Paediatr.</i> 2013 Jan;102(1):8-14.                                                                                                                                                                                                   |
| McAnulty 2009   | McAnulty G, Duffy FH, Butler S, et al. (2009) Individualized developmental care for a large sample of very preterm infants: Health, neurobehavior and neurophysiology. <i>Acta Paediatrica</i> 98: 1920–1926. (NIDCAP)                                                                                                                                                                                                          |
| McAnulty 2010   | McAnulty GB, Duffy FH, Butler SC, Bernstein JH, Zurakowski D, Als H. Effects of the Newborn Individualized Developmental Care and Assessment Program (NIDCAP) at age 8 years: preliminary data. <i>Clin Pediatr (Phila).</i> 2010 Mar;49(3):258-70. doi: 10.1177/0009922809335668. Epub 2009 May 15. Erratum in: <i>Clin Pediatr (Phila).</i> 2010 Aug;49(8):816. PMID: 19448128; PMCID: PMC4097037.                            |
| McAnulty 2013   | McAnulty G, Duffy FH, Kosta S, et al. (2013) School-age effects of the newborn individualized developmental care and assessment program for preterm infants with intrauterine growth restriction: Preliminary findings. <i>Bio Med Central Pediatrics</i> 13(25): 1–20. (RCT follow-up) (NIDCAP)                                                                                                                                |
| McLean 2022     | Mclean MA, Scoten OC, Yu W, Ye XY, Petrie J, Church PT, Soraisham AS, Mirea LS, Weinberg J, Synnes AR, O'Brien K, Grunau RE. Lower Maternal Chronic Physiological Stress and Better Child Behavior at 18 Months: Follow-Up of a Cluster Randomized Trial of Neonatal Intensive Care Unit Family Integrated Care. <i>J Pediatr.</i> 2022 Apr;243:107-115.e4. doi: 10.1016/j.jpeds.2021.12.055. Epub 2021 Dec 29. PMID: 34971651. |
| Melnyk 2001     | Melnyk BM, Alpert-Gillis L, Feinstein NF, Fairbanks E, Schultz-Czarniak J, Hust D, et al. Improving cognitive development of low-birth-weight premature infants with the COPE program: a pilot study of the benefit of early NICU intervention with mothers. <i>Research in Nursing &amp; Health</i> 2001, 24(5): 373-389.                                                                                                      |
| Melnyk 2006     | Melnyk BM, Feinstein NF, Alpert-Gillis L, et al. Reducing premature infants' length of stay and improving parents' mental health outcomes with the creating opportunities for parent empowerment (COPE) neonatal intensive care unit program: a randomized, controlled trial. <i>Pediatrics.</i> 2006;118:e1414-e1427                                                                                                           |
| Meyer 1994      | Meyer EC, Coll CT, Lester BM, Boukydis CF, McDonough SM, Oh W. Family-based intervention improves maternal psychological well-being and feeding interaction of preterm infants. <i>Pediatrics</i> 1994, 93(2):241-246                                                                                                                                                                                                           |
| Mianaei 2014    | Mianaei SJ, Karahroudy FA, Rassouli M, Tafreshi MZ. The effect of Creating Opportunities for Parent Empowerment program on maternal stress, anxiety, and participation in NICU wards in Iran. <i>Iran J Nurs Midwifery Res</i> 2014, 19(1): 94-100                                                                                                                                                                              |
| Milgrom 2010    | Milgrom J, Newnham C, Anderson PJ, Doyle LW, Gemmill AW, Lee K, Hunt RW, Bear M, Inder T. Early Sensitivity Training for Parents of Preterm Infants: Impact on the Developing Brain. <i>Pediatric Research.</i> 2010; 67(3):330–335.                                                                                                                                                                                            |

|                  |                                                                                                                                                                                                                                                                                                                                                              |
|------------------|--------------------------------------------------------------------------------------------------------------------------------------------------------------------------------------------------------------------------------------------------------------------------------------------------------------------------------------------------------------|
| Milgrom 2013     | Milgrom J, Newnham C, Martin PR, et al. Early communication in preterm infants following intervention in the NICU. <i>Early Hum Dev.</i> 2013;89(9):755–762.                                                                                                                                                                                                 |
| Milgrom 2019     | Milgrom J, Martin PR, Newnham C, Holt CJ, Anderson PJ, Hunt RW, Reece J, Ferretti C, Achenbach T, Gemmill AW. Behavioural and cognitive outcomes following an early stress-reduction intervention for very preterm and extremely preterm infants. <i>Pediatr Res.</i> 2019 Jul;86(1):92-99. doi: 10.1038/s41390-019-0385-9. Epub 2019 Apr 9. PMID: 30965355. |
| Mousavi 2021     | Mousavi SS, Keramat A, Chaman R, Mohagheghi P, Mousavi SA, Khosravi A. Impact of Maternity Support Program on the Stress of Mothers in the First Encounter with the Preterm Infants. <i>Int J Prev Med.</i> 2021 Jun 25;12:68. doi: 10.4103/ijpvm.IJPVM_314_19. PMID: 34447510; PMCID: PMC8356949.                                                           |
| Murphy 2021      | Murphy M, Shah V, Benzies K. Effectiveness of Alberta Family-Integrated Care on Neonatal Outcomes: A Cluster Randomized Controlled Trial. <i>J Clin Med.</i> 2021 Dec 14;10(24):5871. doi: 10.3390/jcm10245871. PMID: 34945163; PMCID: PMC8708302.                                                                                                           |
| Myers 2015       | Myers MM, Grieve PG, Stark RI, et al. (2015) Family nurture intervention in preterm infants alters frontal cortical functional connectivity assessed by EEG coherence. <i>Acta Paediatrica</i> 104: 670–677. (RCT follow-up)                                                                                                                                 |
| Namprom 2018     | Namprom 2018: The effect of maternal participation in preterm's care and improved short-term growth and neurodevelopment outcomes. <a href="https://doi.org/10.1016/j.jnn.2018.03.003">https://doi.org/10.1016/j.jnn.2018.03.003</a>                                                                                                                         |
| Newnham 2009     | Newnham CA, Milgrom J, Skouteris H. Effectiveness of a modified Mother-Infant Transaction Program on outcomes for preterm infants from 3 to 24 months of age. <i>Infant Behav Dev</i> 2009, 32(1): 17-26.                                                                                                                                                    |
| Nordhov 2010 (a) | Nordhov SM, Kaaresen PI, Ronning JA, Ulvund SE, Dahl LB. A randomized study of the impact of a sensitizing intervention on the child-rearing attitudes of parents of low birth weight preterm infants. <i>Scandinavian Journal of Psychology.</i> 2010; 51(5):385–391. (a)                                                                                   |
| Nordhov 2010 (b) | Nordhov SM, Ronning JA, Dahl LB, Ulvund SE, Tunby J, Kaaresen PI: Early intervention improves cognitive outcomes for preterm infants: Randomized controlled trial. <i>Pediatrics</i> 2010, 126(5):e1088-e1094. (b)                                                                                                                                           |
| Nordhov 2012     | Nordhov SM, Ronning JA, Ulvund SE, Dahl LB, Kaaresen PI. Early intervention improves behavioral outcomes for preterm infants: randomized controlled trial. <i>Pediatrics.</i> 2012;129(1):e9-e16. doi: 10.1542/peds.2011-0248; 10.1542/peds.2011-0248                                                                                                        |
| Northrup 2016    | Northrup TF, Evans PW, Lillie ML, Tyson JE. A free parking trial to increase visitation and improve extremely low birth weight infant outcomes. <i>J Perinatol.</i> 2016 Dec;36(12):1112-1115. doi: 10.1038/jp.2016.136. Epub 2016 Sep 22. PMID: 27654495; PMCID: PMC5130615.                                                                                |
| Nurcombe 1984    | Nurcombe B, Howell DC, Rauh VA, et al. An intervention program for mothers of low-birthweight infants: preliminary results. <i>J Am Acad Child Psychiatr</i> 1984;23:319e25.                                                                                                                                                                                 |
| O'Brien 2018     | O'Brien K, Robson K, Bracht M, Cruz M, Lui K, Alvaro R, et al. Effectiveness of Family Integrated Care in neonatal intensive care units on infant and parent outcomes: a multicentre, multinational, cluster randomised controlled trial. <i>Lancet Child Adolesc Health</i> 2018;2(4):245e54.                                                               |

|                  |                                                                                                                                                                                                                                                                                                                                                                                                                                                                 |
|------------------|-----------------------------------------------------------------------------------------------------------------------------------------------------------------------------------------------------------------------------------------------------------------------------------------------------------------------------------------------------------------------------------------------------------------------------------------------------------------|
| Oberg 2020       | Gunn Kristin Oberg, Gay L Girolami, Suzann K Campbell, Tordis Ustad, Ivar Heuch, Bjarne K Jacobsen, Per Ivar Kaaresen, Vibeke Smith Aulie, Lone Jørgensen, Effects of a Parent-Administered Exercise Program in the Neonatal Intensive Care Unit: Dose Does Matter—A Randomized Controlled Trial, <i>Physical Therapy</i> , Volume 100, Issue 5, May 2020, Pages 860–869, <a href="https://doi.org/10.1093/ptj/pzaa014">https://doi.org/10.1093/ptj/pzaa014</a> |
| Oehler 1990      | Oehler JM, Vileisis RA. Effect of early sibling visitation in an intensive care nursery. <i>J Dev Behav Pediatr.</i> 1990 Feb;11(1):7-12. PMID: 2303557.                                                                                                                                                                                                                                                                                                        |
| Ohgi 2004        | Ohgi S, Fukuda M, Akiyama T, Gima H: Effect of an early intervention programme on low birthweight infants with cerebral injuries. <i>Journal of Paediatric and Child Health</i> 2004, 40(12):689-695.                                                                                                                                                                                                                                                           |
| Olafsen 2008     | Olafsen KS, Kaaresen PI, Handega° rd BH, Ulvund SE, Dahl LB, et al. (2008) Maternal ratings of infant regulatory competence from 6 to 12 months: Influence of perceived stress, birth-weight, and intervention. <i>A randomized controlled trial. Infant Behav Dev</i> 31: 408–421.                                                                                                                                                                             |
| Örtenstrand 2010 | Örtenstrand, A., Westrup, B., Broström, E. B., Sarman, I., Åkerström, S., Brune, T., Waldenström, U. (2010). The Stockholm neonatal family centered care study: Effects on length of stay and infant morbidity. <i>Pediatrics</i> , 125(2), e278–e285.                                                                                                                                                                                                          |
| Oyekunle 2021    | Oyekunle OO, Bella-Awusah T, Ayede AI, Omigbodun OO, Ani CC. Effect of a Brief Supportive and Educational Intervention on the Psychological Well-Being of Mothers with Babies in Neonatal Wards of a Tertiary Hospital in Ibadan, Nigeria. <i>J Trop Pediatr.</i> 2021 May 17;67(2):fmab038. doi: 10.1093/tropej/fmab038. PMID: 34013326; PMCID: PMC8134906.                                                                                                    |
| Peters 2009      | Peters KL, Rosychuk RJ, Hendson L, et al. Improvement of short- and long-term outcomes for very low birth weight infants: edmonton NIDCAP trial. <i>Pediatrics</i> 2009;124:1009–20.                                                                                                                                                                                                                                                                            |
| Petteys 2018     | Petteys 2018: Petteys AR, Adoumie D. Mindfulness-Based Neurodevelopmental Care: Impact on NICU Parent Stress and Infant Length of Stay; A Randomized Controlled Pilot Study. <i>Adv Neonatal Care.</i> 2018 Apr;18(2):E12-E22. doi: 10.1097/ANC.0000000000000474. PMID: 29595555.                                                                                                                                                                               |
| Pillai 2021      | Pillai A, Pournami F, Prabhakar J, Nair P, Jain N. Effect of Early Parent Participation Program on Physiological Stability in Preterm Infants: A Randomized Controlled Trial. <i>Am J Perinatol.</i> 2021 Mar 23. doi: 10.1055/s-0041-1726126. Epub ahead of print. PMID: 33757140.                                                                                                                                                                             |
| Pineda 2021      | Pineda R, Smith J, Roussin J, Wallendorf M, Kellner P, Colditz G. Randomized clinical trial investigating the effect of consistent, developmentally-appropriate, and evidence-based multisensory exposures in the NICU. <i>J Perinatol.</i> 2021 Oct;41(10):2449-2462. doi: 10.1038/s41372-021-01078-7. Epub 2021 May 19. PMID: 34012055; PMCID: PMC8516670.                                                                                                    |
| Pisoni 2021      | Pisoni C, Provenzi L, Moncecchi M, Caporali C, Naboni C, Stronati M, Montirosso R, Borgatti R, Orcesi S. Early parenting intervention promotes 24-month psychomotor development in preterm children. <i>Acta Paediatr.</i> 2021 Jan;110(1):101-108. doi: 10.1111/apa.15345. Epub 2020 Jun 3. PMID: 32392381.                                                                                                                                                    |
| Porges 2019      | Porges SW, Davila MI, Lewis GF, Kolacz J, Okonmah-Obazee S, Hane AA, Kwon KY, Ludwig RJ, Myers MM, Welch MG. Autonomic regulation of preterm infants is enhanced by Family Nurture Intervention. <i>Dev Psychobiol.</i> 2019 Sep;61(6):942-952. doi: 10.1002/dev.21841. Epub 2019 Mar 13. PMID: 30868570.                                                                                                                                                       |

|                     |                                                                                                                                                                                                                                                                                                                                                         |
|---------------------|---------------------------------------------------------------------------------------------------------------------------------------------------------------------------------------------------------------------------------------------------------------------------------------------------------------------------------------------------------|
| Rajabi 2021         | Rajabi A, Maleki A, Dadashi M, Karami Tanha F. The Effect of Problem-Solving-Approach-Based Counselling on Maternal Role Adaptation in Women with Late Preterm Infant: A Randomized Controlled Trial. <i>J Caring Sci.</i> 2021 May 24;10(2):62-69.                                                                                                     |
| Ravn 2011           | Ravn IH, Smith L, Lindemann R, Smeby NA, Kyno NM, Bunch EH, Sandvik L. Effect of early intervention on social interaction between mothers and preterm infants at 12 months of age: A randomized controlled trial. <i>Infant Behavior &amp; Development</i> 2011, 34(2):215-225                                                                          |
| Ravn 2012 (a)       | Ravn IH, Smith L, Smeby NA, Kynoe NM, Sandvik L, Bunch EH, Lindemann R. Effects of early mother-infant intervention on outcomes in mothers and moderately and late preterm infants at age 1 year: a randomized controlled trial. <i>Infant Behav Dev.</i> 2012 Feb;35(1):36-47. doi: 10.1016/j.infbeh.2011.09.006. (a)                                  |
| Ravn 2012 (b)       | Ravn IH, Lindemann R, Smeby NA, Bunch EH, Sandvik L, Smith L. Stress in fathers of moderately and late preterm infants: A randomised controlled trial. <i>Early Child Development and Care</i> 2012, 182(5): 537-552. (b)                                                                                                                               |
| Rostami 2020        | Fallah Rostami, Fatemeh & Soleimani, Farin & Norouzi, Mehdi & Hatamizadeh, Nikta & Mokhtarinouri, Jamileh & Poshtmashhadi, Marjan. (2020).Preterm Infant Neurodevelopmental Care Training Program and Mother-Infant Attachment. <i>International Journal of Women's Health and Reproduction Sciences.</i> 8. 192-197. 10.15296/ijwhr.2020.30. Epub 2019 |
| Russel 2021         | Russell LN, Gregory ML, Warren ZE, Weitlauf AS. Uptake and impact of journaling program on wellbeing of NICU parents. <i>J Perinatol.</i> 2021 Aug;41(8):2057-2062. doi: 10.1038/s41372-021-00983-1. Epub 2021 Mar 1. PMID: 33649444.                                                                                                                   |
| Sajadi 2020         | Sajadi 2020: Sajadi H, Akhoundzadeh G, Hojjati H. The effect of empowerment program on participation of mothers with premature infants hospitalized in neonatal intensive care unit of sayyed shirazi hospital in gorgan, in 2018. <i>Indian journal of forensic medicine and toxicology</i> , 2020, 14(2), 1269-1276                                   |
| Schroeder 2006      | Schroeder M, Pridham K. Development of relationship competencies through guided participation for mothers of preterm infants. <i>J Obstet Gynecol Neonatal Nurs.</i> 2006 May-Jun;35(3):358-68. doi: 10.1111/j.1552-6909.2006.00049.x. PMID: 16700685.                                                                                                  |
| Schwab 1983         | Schwab F, Tolbert B, Bagnato S, Maisels MJ. Sibling visiting in a neonatal intensive care unit. <i>Pediatrics.</i> 1983 May;71(5):835-8. PMID: 6835771.                                                                                                                                                                                                 |
| Seiiedi-Biarag 2021 | Seiiedi-Biarag L, Mirghafourvand M, Esmaeilpour K, Hasanpour S. A randomized controlled clinical trial of the effect of supportive counseling on mental health in Iranian mothers of premature infants. <i>BMC Pregnancy Childbirth.</i> 2021 Jan 5;21(1):6. doi: 10.1186/s12884-020-03502-w. PMID: 33402123; PMCID: PMC7782568.                        |
| Seyedrasooli 2020   | Seyedrasooli, Alehe & Malakouti, Jamileh & Jabraeili, Mahnaz & Heykalabadi, Soraya & Ghogazadeh, Morteza. (2020). The effect of the supportive program on the anxiety of mothers of infants with gastrointestinal anomalies. <i>Nursing Practice Today.</i> 7. 10.18502/npt.v7i2.2732.                                                                  |
| Shaw 2013           | Shaw RJ, St John N, Lilo EA, Jo B, Benitz W, Stevenson DK, Horwitz SM. Prevention of traumatic stress in mothers with preterm infants: a randomized controlled trial. <i>Pediatrics.</i> 2013 Oct;132(4):e886-94. doi: 10.1542/peds.2013-1331. Epub 2013 Sep 2. PMID: 23999956; PMCID: PMC3784295.                                                      |
| Shaw 2014           | Shaw RJ, St John N, Lilo E, Jo B, Benitz W, Stevenson DK, Horwitz SM. Prevention of traumatic stress in mothers of preterms: 6-month outcomes. <i>Pediatrics.</i> 2014 Aug;134(2):e481-8. doi: 10.1542/peds.2014-0529. PMID: 25049338; PMCID: PMC4187238.                                                                                               |

|                      |                                                                                                                                                                                                                                                                                                                                                                             |
|----------------------|-----------------------------------------------------------------------------------------------------------------------------------------------------------------------------------------------------------------------------------------------------------------------------------------------------------------------------------------------------------------------------|
| Silverstein 2011     | Silverstein M, Feinberg E, Cabral H, et al. Problem-solving education to prevent depression among low-income mothers of preterm infants: a randomized controlled pilot trial. <i>Arch Women Ment Health</i> . 2011;14(4):317–324                                                                                                                                            |
| Synnes 2022          | Synnes AR, Petrie J, Grunau RE, Church P, Kelly E, Moddemann D, Ye X, Lee SK, O'Brien K; Canadian Neonatal Network Investigators; Canadian Neonatal Follow-Up Network Investigators. Family integrated care: very preterm neurodevelopmental outcomes at 18 months. <i>Arch Dis Child Fetal Neonatal Ed</i> . 2022 Jan;107(1):76-81. doi: 10.1136/archdischild-2020-321055. |
| Tavasolnia 2017      | Tavasolnia, S., Ravanipour, M., Kamali, F., Motamed, N., Pouladi, S. (2017). The effect of Empowerment of Grandmother on Depression and Maternal Role Realization in Primiparae with Hospitalized Infant: A Randomized, Controlled, Clinical Trial. <i>Evidence Based Care</i> , 7(1), 43-52. doi: 10.22038/ebcj.2017.22321.1496                                            |
| Teti 2009            | Teti, D. M., Black, M. M., Viscardi, R., Glass, P., O'Connell, M. A., Baker, L., Cusson, R., & Reiner Hess, C. (2009). Intervention with African American premature infants: Four-month results of an early intervention program. <i>Journal of Early Intervention</i> , 31(2), 146-166.                                                                                    |
| Turan 2008           | Turan T, Basbakkal Z, Ozbek S. Effect of nursing interventions on stressors of parents of premature infants in neonatal intensive care unit. <i>J Clin Nurs</i> 2008, 17(21): 2856-2866.                                                                                                                                                                                    |
| Twohig 2021          | Twohig A, Murphy JF, McCarthy A, Segurado R, Underdown A, Smyke A, McNicholas F, Molloy EJ. The preterm infant-parent programme for attachment-PIPPA Study: a randomised controlled trial. <i>Pediatr Res</i> . 2021 Sep;90(3):617-624. doi: 10.1038/s41390-020-01262-z.                                                                                                    |
| Ustad 2016           | Ustad T, Evensen KAI, Campbell SK, et al. Early parent-administered physical therapy for preterm infants: a randomized controlled trial. <i>Pediatrics</i> 2016; 138: e20160271                                                                                                                                                                                             |
| Van der Pal 2007     | Van der Pal SM, Maguire CM, le Cessie S, Wit JM, Walther FJ, Bruil J. Parental experiences during the first period at the neonatal unit after two developmental care interventions. <i>Acta Paediatr</i> . 2007 Nov;96(11):1611-6.                                                                                                                                          |
| Van der Pal 2008 (a) | Van der Pal SM, Maguire CM, Bruil J, Le Cessie S, Wit JM, Walther FJ, Veen S. Health-related quality of life of very preterm infants at 1 year of age after two developmental care-based interventions. <i>Child Care Health Dev</i> . 2008 Sep;34(5):619-25. doi: 10.1111/j.1365-2214.2008.00840.x. Epub 2008 Jun 28. PMID: 18549436. (a)                                  |
| Van der Pal 2008 (b) | Van der Pal S, Maguire CM, Le Cessie S, et al. Parental Stress and Child Behavior and Temperament in the First Year After the Newborn Individualized Developmental Care and Assessment Program. <i>Journal of Early Intervention</i> . 2008;30(2):102-115. doi:10.1177/1053815107313485. (b)                                                                                |
| Verkerk 2012         | Verkerk G, Jeukens-Visser M, Houtzager B, et al. (2012) The infant and behavioral assessment and intervention program in very low birth weight infants: outcome on executive functioning, behavior and cognition at preschool age. <i>Early Human Development</i> 88: 699–705.                                                                                              |
| Verma 2017           | Verma A, Maria A, Pandey RM, Hans C, Verman A, Sherwani F. Family centered care to complement care of sick newborns: a randomized controlled trial. <i>Indian Pediatr</i> 2017;54(6):455e9.                                                                                                                                                                                 |
| Viera 2010           | Viera Claudia Silveira, Bugs Bruna Maria, Fonseca Luciana Mara Monti, Guimarães Ana Tereza Bittencourt, Machinesk Gicele Galvan. O estresse em mães de prematuros: ensaio clínico sobre atividade educativa. <i>Arq. bras. psicol</i> . 2019; 71( 1 ): 19-35.                                                                                                               |

|                          |                                                                                                                                                                                                                                                                                                                                                                                                       |
|--------------------------|-------------------------------------------------------------------------------------------------------------------------------------------------------------------------------------------------------------------------------------------------------------------------------------------------------------------------------------------------------------------------------------------------------|
| Villamizar-Carvajal 2018 | Villamizar-Carvajal B, Vargas-Porras C, García-Corzo JR. Decrease of premature mothers' stress levels in the intensive care unit. <i>Enferm Intensiva (Engl Ed)</i> . 2018 Jul-Sep;29(3):113-120. English, Spanish. doi: 10.1016/j.enfi.2017.12.004. Epub 2018 Apr 4. PMID: 29625857.                                                                                                                 |
| Vonderheid 2016          | Vonderheid SC, Rankin K, Norr K, Vasa R, Hill S, White-Traut R. Health Care Use Outcomes of an Integrated Hospital-to-Home Mother-Preterm Infant Intervention. <i>J Obstet Gynecol Neonatal Nurs</i> . 2016 Sep-Oct;45(5):625-38. doi: 10.1016/j.jogn.2016.05.007. Epub 2016 Aug 6. PMID: 27505467.                                                                                                   |
| Vonderheid 2020          | Vonderheid SC, Park CG, Rankin K, Norr KF, White-Traut R. Impact of an integrated mother-preterm infant intervention on birth hospitalization charges. <i>J Perinatol</i> . 2020 Jun;40(6):858-866. doi: 10.1038/s41372-019-0567-7. Epub 2020 Jan 8. PMID: 31913324; PMCID: PMC7253350.                                                                                                               |
| Weis 2013                | Weis J, Zoffmann V, Greisen G, Egerod I. The effect of person-centred communication on parental stress in a NICU: A randomized clinical trial. <i>Acta Paediatrica</i> 2013, 102(12): 1130-1136.                                                                                                                                                                                                      |
| Welch 2013               | Welch MG, Hofer MA, Stark RI, Andrews HF, Austin J, Glickstein SB, Ludwig RJ, Myers MM; FNI Trial Group. Randomized controlled trial of Family Nurture Intervention in the NICU: assessments of length of stay, feasibility and safety. <i>BMC Pediatr</i> . 2013 Sep 24;13:148. doi: 10.1186/1471-2431-13-148.                                                                                       |
| Welch 2014               | Welch MG, Myers MM, Grieve PG, et al. (2014) Electroencephalographic activity of preterm infants is increased by family nurture intervention: a randomized controlled trial in the NICU. <i>Clinical Neurophysiology</i> 125: 675–684.                                                                                                                                                                |
| Welch 2015               | Welch MG, Firestein MR, Austin J, et al. (2015) Family nurture intervention in the neonatal intensive care unit improves social-relatedness, attention, and neurodevelopment of preterm infants at 18 months in a randomized controlled trial. <i>Journal of Child Psychology and Psychiatry</i> 56(11): 1202–1211. (RCT follow-up)                                                                   |
| Welch 2016               | Welch MG, Halperin MS, Austin J, Stark RI, Hofer MA, Hane AA, Myers MM. Depression and anxiety symptoms of mothers of preterm infants are decreased at 4 months corrected age with Family Nurture Intervention in the NICU. <i>Arch Womens Ment Health</i> . 2016 Feb;19(1):51-61.                                                                                                                    |
| Welch 2017               | Welch MG, Stark RI, Grieve PG, Ludwig RJ, Isler JR, Barone JL, Myers MM. Family nurture intervention in preterm infants increases early development of cortical activity and independence of regional power trajectories. <i>Acta Paediatr</i> . 2017 Dec;106(12):1952-1960. doi: 10.1111/apa.14050. Epub 2017 Sep 25. PMID: 28850710.                                                                |
| Welch 2020 (a)           | Welch MG, Barone JL, Porges SW, Hane AA, Kwon KY, Ludwig RJ, Stark RI, Surman AL, Kolacz J, Myers MM. Family nurture intervention in the NICU increases autonomic regulation in mothers and children at 4-5 years of age: Follow-up results from a randomized controlled trial. <i>PLoS One</i> . 2020 Aug 4;15(8):e0236930. doi: 10.1371/journal.pone.0236930. PMID: 32750063; PMCID: PMC7402490 (a) |
| Welch 2020 (b)           | Welch MG, Grieve PG, Barone JL, Ludwig RJ, Stark RI, Isler JR, Myers MM. Family nurture intervention alters relationships between preterm infant EEG delta brush characteristics and term age EEG power. <i>Clin Neurophysiol</i> . 2020 Aug;131(8):1909-1916. doi: 10.1016/j.clinph.2020.05.020. (b)                                                                                                 |
| Westrup 2000             | Westrup B, Kleberg A, von Eichwald K, Stjernqvist K, Lagercrantz H. A randomized, controlled trial to evaluate the effects of the newborn individualized developmental care and assessment program in a Swedish setting. <i>Pediatrics</i> . 2000 Jan;105(1 Pt 1):66-72. doi: 10.1542/peds.105.1.66. PMID: 10617706.                                                                                  |



|                     |                                                                                                                                                                                                                                                                                                                                                   |
|---------------------|---------------------------------------------------------------------------------------------------------------------------------------------------------------------------------------------------------------------------------------------------------------------------------------------------------------------------------------------------|
| Westrup<br>2004     | Westrup B, Böhm B, Lagercrantz H, Stjernqvist K. Preschool outcome in children born very prematurely and cared for according to the Newborn Individualized Developmental Care and Assessment Program (NIDCAP). <i>Acta Paediatr.</i> 2004 Apr;93(4):498-507. doi: 10.1080/08035250410023548. PMID: 15188978.                                      |
| White-Traut<br>1988 | White-Traut RC, Nelson MN. Maternally administered tactile, auditory, visual, and vestibular stimulation: relationship to later interactions between mothers and premature infants. <i>Res Nurs Health.</i> 1988 Feb;11(1):31-9. doi: 10.1002/nur.4770110106. PMID: 3347763.                                                                      |
| White-Traut<br>2012 | White-Traut R, Wink T, Minehart T, Holditch-Davis D. Frequency of Premature Infant Engagement and Disengagement Behaviors During Two Maternally Administered Interventions. <i>Newborn Infant Nurs Rev.</i> 2012 Sep;12(3):124-131. doi: 10.1053/j.nainr.2012.06.005. PMID: 22984346; PMCID: PMC3438916                                           |
| White-Traut<br>2013 | White-Traut R, Norr KF, Fabiyi C, Rankin KM, Li Z, Liu L. Mother-infant interaction improves with a developmental intervention for mother-preterm infant dyads. <i>Infant Behav Dev.</i> 2013 Dec;36(4):694-706.                                                                                                                                  |
| White-Traut<br>2015 | White-Traut RC, Rankin KM, Yoder JC, Liu L, Vasa R, Geraldo V, Norr KF. Influence of H-HOPE intervention for premature infants on growth, feeding progression and length of stay during initial hospitalization. <i>J Perinatol.</i> 2015 Aug;35(8):636-41. doi: 10.1038/jp.2015.11. Epub 2015 Mar 5. PMID: 25742287; PMCID: PMC4520757.          |
| Whitehill<br>2021   | Whitehill L, Smith J, Colditz G, Le T, Kellner P, Pineda R. Socio-demographic factors related to parent engagement in the NICU and the impact of the SENSE program. <i>Early Hum Dev.</i> 2021 Dec;163:105486. doi: 10.1016/j.earlhumdev.2021.105486. Epub 2021 Oct 14. PMID: 34715530; PMCID: PMC8629943.                                        |
| Wu 2014             | Wu YC, Leng CH, Hsieh WS, et al. A randomized controlled trial of clinic-based and home-based Interventions in comparison with usual care for preterm infants: effects and mediators. <i>Res Dev Disabil</i> 2014; 35: 2384–93.                                                                                                                   |
| Xie 2019            | Xie J, Zhu L, Zhu T, Jian Y, Ding Y, Zhou M, Feng X. Parental Engagement and Early Interactions With Preterm Infants Reduce Risk of Late Postpartum Depression. <i>J Nerv Ment Dis.</i> 2019 May;207(5):360-364. doi: 10.1097/NMD.0000000000000971. PMID: 30925507.                                                                               |
| Yilmaz 2021         | Yilmaz 2021: Yilmaz G, Küçük Alemdar D. The Effect of Supportive Nursing Interventions on Reducing Stress Levels of Mothers of Infants in the Neonatal Intensive Care Unit: A Randomized Controlled Trial. <i>Clin Nurs Res.</i> 2021 Sep 24:10547738211047359. doi: 10.1177/10547738211047359.                                                   |
| Yu 2017             | Yu, Y. T., Hsieh, W. S., Hsu, C. H., Lin, Y. J., Lin, C. H., Hsieh, S., ... Yao, N. J. (2017). Family-centered care improved neonatal medical and neurobehavioral outcomes in preterm infants: Randomized controlled trial. <i>Physical Therapy</i> , 97(12), 1158–1168                                                                           |
| Zelkowitz<br>2011   | Zelkowitz P, Feeley N, Shrier I, Stremler R, Westreich R, Dunkley D, Steele R, Rosberger Z, Lefebvre F, Papageorgiou A. The cues and care randomized controlled trial of a neonatal intensive care unit intervention: effects on maternal psychological distress and mother-infant interaction. <i>J Dev Behav Pediatr.</i> 2011 Oct;32(8):591-9. |
| Zeraati 2017        | H. Zeraati, F. Nasimi, M. Milan Dalei, J. Shahinfar, A. Momenizade, A. Barfidokht. The Effect of Family-centered Care Program on Maternal Attachment in Mothers of Premature Infants. <i>J Babol Univ Med Sci</i> ; 19(6); Jun 2017; PP: 22-7                                                                                                     |

Zhang 2018

Zhang 2018: Zhang R, Huang RW, Gao XR, Peng XM, Zhu LH, Rangasamy R, Latour JM. Involvement of Parents in the Care of Preterm Infants: A Pilot Study Evaluating a Family-Centered Care Intervention in a Chinese Neonatal ICU. *Pediatr Crit Care Med*. 2018 Aug;19(8):741-747. doi: 10.1097/PCC.0000000000001586. PMID: 29781955.

Supplemental File 4. Characteristics of included RCTs

| Author and year of publication | Study design (pilot, long term extension)            | Country                        | WB Level | Setting (n° of facilities involved) | Receivers of the intervention <sup>1</sup> |                                              | Health professionals                               |                                                     | FCC components of the intervention | Interventions both in hospital and after discharge |
|--------------------------------|------------------------------------------------------|--------------------------------|----------|-------------------------------------|--------------------------------------------|----------------------------------------------|----------------------------------------------------|-----------------------------------------------------|------------------------------------|----------------------------------------------------|
|                                |                                                      |                                |          |                                     | Parents (mothers [M], fathers [F])         | Newborns (birth weight, gestational age)     | Involved in the intervention delivery <sup>2</sup> | Involved as receiver of an educational intervention |                                    |                                                    |
| Abdel Latif 2015               | Cross-over RCT                                       | Australia                      | HIC      | NICU (1)                            | 72 parents (M, F)                          | NS                                           | Yes                                                | No                                                  | CI                                 | No                                                 |
| Affleck 1989                   | RCT                                                  | USA                            | HIC      | NICU (1)                            | 94 parents (M, F)                          | NS (all infants admitted in NICU)            | Yes                                                | No                                                  | EDI                                | Yes                                                |
| Alijanzadeh Zaferani 2021      | RCT                                                  | Iran                           | L-MIC    | NICU (2)                            | 80 M                                       | 80 (all newborns admitted in NICU)           | Yes                                                | No                                                  | EDI                                | No                                                 |
| Al-Maghaireh 2020              | RCT                                                  | Jordan                         | U-MIC    | NICU (1)                            | 50 M                                       | 50 (30-35 wks, NS)                           | Yes                                                | No                                                  | EDI                                | No                                                 |
| Als 1994                       | RCT                                                  | USA                            | HIC      | NICU (1)                            | NS                                         | 38 (<30 wks, <1250g)                         | Yes                                                | Yes                                                 | ENI, FCP, CI, EDI, FSI             | No                                                 |
| Als 2003                       | RCT                                                  | USA                            | HIC      | NICU (3)                            | 92 M                                       | 92 (< 28 wks, <1250g)                        | Yes                                                | Yes                                                 | ENI, FCP, CI, EDI, FSI             | No                                                 |
| Als 2004                       | RCT                                                  | USA                            | HIC      | NICU (2)                            | NS                                         | 30 (28-33 wks, NS)                           | Yes                                                | Yes                                                 | ENI, FCP, CI, EDI, FSI             | No                                                 |
| Als 2011                       | RCT                                                  | USA                            | HIC      | NICU (1)                            | 30 parents (M, F)                          | 30 (28-33 wks, NS)                           | Yes                                                | Yes                                                 | ENI, FCP, CI, EDI, FSI             | No                                                 |
| Als 2012                       | RCT                                                  | USA                            | HIC      | NICU (1)                            | NS                                         | 30 (27-33 wks, NS)                           | Yes                                                | Yes                                                 | ENI, FCP, CI, EDI, FSI             | No                                                 |
| Andrews 2020                   | RCT                                                  | USA                            | HIC      | NICU (2)                            | 46 M                                       | 46 (30-36 wks, NS)                           | No                                                 | No                                                  | FSI                                | No                                                 |
| Ariagno 1997                   | RCT                                                  | USA                            | HIC      | NICU (1)                            | NS                                         | 35 (<30 wks, <1250g)                         | Yes                                                | Yes                                                 | ENI, FCP, CI, EDI, FSI             | No                                                 |
| Bastani 2015                   | RCT                                                  | Iran                           | L-MIC    | NICU (1)                            | 110 M                                      | 110 (30-34 wks, NS)                          | Yes                                                | No                                                  | EDI                                | No                                                 |
| Beebe 2018                     | RCT (long term extension of Welch 2013)              | USA                            | HIC      | NICU (1)                            | 71 M                                       | 71 (26-34 wks, NS)                           | Yes                                                | Yes                                                 | ENI, EDI, FSI                      | No                                                 |
| Beheshtipour 2014              | RCT                                                  | Iran                           | L-MIC    | NICU (1)                            | 120 parents (60 M, 60 F)                   | 60 (28-37 wks, NS)                           | Yes                                                | No                                                  | EDI                                | No                                                 |
| Benzies 2020                   | RCT                                                  | Canada                         | HIC      | NICU (10)                           | 654 M                                      | 765 (32-34 wks, NS)                          | Yes                                                | Yes                                                 | CI, EDI, FSI                       | No                                                 |
| Bernard 2011                   | RCT (pilot)                                          | USA                            | HIC      | NICU (1)                            | 56 M                                       | NS (<37wks, >1000g)                          | Yes                                                | Yes                                                 | CI, EDI                            | No                                                 |
| Borghini 2014                  | RCT                                                  | Switzerland                    | HIC      | NICU (1)                            | 60 M                                       | N 60 (<33 wks, NS)                           | Yes                                                | Yes                                                 | EDI                                | Yes                                                |
| Brisch 2003                    | RCT                                                  | Germany                        | HIC      | NICU (1)                            | 87 M                                       | 87 (24-35 wks, ≤1500g)                       | Yes                                                | No                                                  | EDI, FSI                           | Yes                                                |
| Browne 2005                    | RCT                                                  | USA                            | HIC      | NICU (1)                            | 84 M                                       | 84 (<36 wks, NS)                             | Yes                                                | No                                                  | EDI                                | No                                                 |
| Campbell-Yeo 2021              | RCT (single-centered)                                | Canada                         | HIC      | NICU (1)                            | 71 M                                       | 71 (<34 wks; NS)                             | No                                                 | No                                                  | ENI                                | No                                                 |
| Chen 2013                      | RCT                                                  | Taiwan                         | HIC      | NICU (3)                            | NS                                         | 178 (NS, <1500gr) + 62 term control newborns | Yes                                                | No                                                  | EDI                                | Yes                                                |
| Cheng 2019                     | RCT (cluster, secondary publication of O'Brien 2018) | Canada, Australia, New Zealand | HIC      | NICU (26)                           | 1383 M                                     | NS (≤33 wks, NS)                             | Yes                                                | Yes                                                 | ENI, FCP, CI, EDI, FSI             | No                                                 |
| Church 2020                    | RCT                                                  | Canada                         | HIC      | NICU (14)                           | 185 M                                      | 185 (≤33 wks, NS)                            | Yes                                                | Yes                                                 | ENI, FCP, CI, EDI, FSI             | No                                                 |
| Clarke-pounder 2014            | RCT                                                  | USA                            | HIC      | NICU (1)                            | 19 parents (M, F)                          | 19 (NO wks or weight restrictions)           | Yes                                                | No                                                  | CI                                 | No                                                 |
| Cobiella 1990                  | RCT                                                  | USA                            | HIC      | NICU (1)                            | 30 M                                       | 30 (<36 wks, <2500g)                         | Yes                                                | No                                                  | EDI                                | No                                                 |

|                     |                                                       |             |       |           |                            |                                                 |     |     |                        |     |
|---------------------|-------------------------------------------------------|-------------|-------|-----------|----------------------------|-------------------------------------------------|-----|-----|------------------------|-----|
| Colditz 2019        | RCT                                                   | Australia   | HIC   | NICU (1)  | 323 parents (M, F)         | 384 (<32 wks, NS)                               | Yes | Yes | EDI                    | Yes |
| Dusing 2015         | RCT (pilot)                                           | USA         | HIC   | NICU (1)  | NS                         | 10 (≤34 wks, NS)                                | Yes | Yes | EDI                    | Yes |
| Dusing 2018         | RCT (pilot)                                           | USA         | HIC   | NICU (1)  | NS                         | 14 (<29 wks, NS)                                | Yes | Yes | EDI                    | Yes |
| Feeley 2012         | RCT (long term extension of Zerkovitz 2011)           | Canada      | HIC   | NICU (2)  | 121 M                      | 121 (NS, <1500g)                                | Yes | Yes | EDI                    | Yes |
| Finlayson 2020      | RCT (pilot)                                           | Australia   | HIC   | NICU (1)  | NS                         | 17 (≤30 wks, NS)                                | Yes | Yes | EDI                    | Yes |
| Fontana 2018        | RCT                                                   | Italy       | HIC   | NICU (1)  | NS                         | 70 (25-29+6 wks, NS)                            | Yes | No  | EDI                    | Yes |
| Fontana 2020        | RCT                                                   | Italy       | HIC   | NICU (1)  | NS                         | 57 (25+0 - 29+6 wks, NS)                        | Yes | No  | EDI                    | Yes |
| Fontana 2021        | RCT                                                   | Italy       | HIC   | NICU (1)  | NS                         | 34 (25-29+6 wks, NS)                            | Yes | No  | EDI                    | Yes |
| Fotiu 2016          | RCT                                                   | Greece      | HIC   | NICU (1)  | 84 parents (M, F)          | NS (<37 wks, NS)                                | Yes | No  | EDI                    | Yes |
| Garfield 2016       | RCT (pilot)                                           | USA         | HIC   | NICU (1)  | 82 parents (41 M, 41 F)    | 54 (NS, <1500 g)                                | No  | No  | EDI                    | Yes |
| Glazebrook 2007     | RCT (crossover)                                       | UK          | HIC   | NICU (6)  | 210 M                      | 233 (<32 wks, NS)                               | Yes | Yes | EDI                    | Yes |
| Gray 2000           | RCT                                                   | USA         | HIC   | NICU (1)  | 75 parents (M, F)          | 75 (NS, <1500g)                                 | Yes | No  | EDI                    | Yes |
| Hane 2015           | RCT                                                   | USA         | HIC   | NICU (1)  | 65 M                       | 65 (26-34 wks, NS)                              | Yes | Yes | ENI, EDI, FSI          | No  |
| Harrison 1986       | RCT                                                   | USA         | HIC   | NICU (2)  | 30 M                       | 30 (28-35 wks, NS)                              | Yes | No  | EDI                    | No  |
| Hauglann 2015       | RCT (long term extension of Kaaresen 2006)            | Norway      | HIC   | NICU (1)  | NS                         | 146 (NS, <2000g)                                | Yes | Yes | EDI                    | Yes |
| Hei 2021            | RCT (cluster)                                         | China       | U-MIC | NICU (11) | 601 M                      | 601 (28-35 wks, >400g)                          | Yes | Yes | ENI, FCP, CI, EDI, FSI | No  |
| Heo 2019            | RCT                                                   | South Korea | HIC   | NICU (1)  | 132 parents (66 M, 66 F)   | 66 (<37 wks, NS)                                | Yes | No  | CI, EDI                | No  |
| Hoffenkamp 2015     | RCT                                                   | Netherlands | HIC   | NICU (9)  | 294 parents (150 M, 144 F) | 150 (<37 wks, NS)                               | Yes | Yes | EDI                    | No  |
| Holditch-Davis 2013 | RCT                                                   | USA         | HIC   | NICU (4)  | 240 M                      | 240 (NS, <1750g)                                | Yes | No  | EDI                    | Yes |
| Holditch-Davis 2014 | RCT (secondary publication of Holditch-Davis 2013)    | USA         | HIC   | NICU (4)  | 240 M                      | 240 (NS, <1750g)                                | Yes | No  | EDI                    | Yes |
| Horwitz 2015        | RCT (secondary publication of Shaw 2013)              | USA         | HIC   | NICU (4)  | 105 M                      | NS (25-34 wks, >600g)                           | Yes | Yes | EDI                    | No  |
| Jafarzadeh 2019     | RCT                                                   | Iran        | L-MIC | NICU (1)  | 50 M                       | NS (33-37 wks, NS)                              | Yes | No  | EDI, FSI               | Yes |
| Johnson 2009        | RCT (cluster, long term extension of Glazebrook 2007) | UK          | HIC   | NICU (7)  | 210 M                      | 233 (<32 wks, NS)                               | Yes | Yes | EDI                    | Yes |
| Kaaresen 2006       | RCT                                                   | Norway      | HIC   | NICU (1)  | NS                         | 146 (<37 wks, <2000g) +75 term control newborns | Yes | Yes | EDI                    | Yes |
| Kaaresen 2008       | RCT (long term extension of Kaaresen 2006)            | Norway      | HIC   | NICU (1)  | 225 parents (122 M, 103 F) | 146 (<37 wks, <2000g)                           | Yes | Yes | EDI                    | Yes |
| Kachosangy 2020     | RCT                                                   | Iran        | L-MIC | NICU (2)  | 45 M                       | 45 (<37 wks, 1000-2500g)                        | Yes | No  | EDI                    | Yes |

|                  |                                             |             |       |           |                                                           |                                                  |     |     |                        |     |
|------------------|---------------------------------------------|-------------|-------|-----------|-----------------------------------------------------------|--------------------------------------------------|-----|-----|------------------------|-----|
| Kang 1995        | RCT                                         | USA         | HIC   | NICU (3)  | 245 M                                                     | 327 (<36 wks, NS)                                | Yes | Yes | EDI                    | Yes |
| Karbandi 2015    | RCT                                         | Iran        | L-MIC | NICU (1)  | 70 M                                                      | 70 (<37 wks, NS)                                 | No  | No  | EDI                    | Yes |
| Kleberg 2002     | RCT (long term extension of Westrup 2000)   | Sweden      | HIC   | NICU (1)  | NS                                                        | 20 (<32 wks, NA)                                 | Yes | Yes | ENI, FCP, CI, EDI, FSI | No  |
| Koldewijn 2009   | RCT                                         | Netherlands | HIC   | NICU (7)  | NS                                                        | 176 (<32 wks, <500g)                             | Yes | Yes | EDI                    | Yes |
| Koldewijn 2010   | RCT (long term extension of Koldewijn 2009) | Netherlands | HIC   | NICU (7)  | NS                                                        | 176 (<32 wks, <1500g)                            | Yes | Yes | EDI                    | Yes |
| Kynø 2012        | RCT (long term extension of Ravn 2011)      | Norway      | HIC   | NICU (1)  | NS                                                        | 82 (30-36 wks, NS)                               | Yes | Yes | EDI                    | Yes |
| Landsem 2014     | RCT (long term extension of Kaaresen 2006)  | Norway      | HIC   | NICU (1)  | 262 parents (131 M, 131 F)                                | 146 (<37 wks, <2000 g) +75 term control newborns | Yes | Yes | EDI                    | Yes |
| Lee 2019         | RCT                                         | China       | U-MIC | NICU (1)  | 30 M                                                      | 30 (<32 wks, NS)                                 | Yes | No  | EDI                    | Yes |
| Maguire 2009     | RCT                                         | Netherlands | HIC   | NICU (2)  | NS                                                        | 164 (<32 wks, NS)                                | Yes | Yes | ENI, FCP, CI, EDI, FSI | No  |
| Matricardi 2013  | RCT                                         | Italy       | HIC   | NICU (1)  | 84 parents (42 M, 42 F)                                   | 42 (<32 wks, NS)                                 | Yes | Yes | EDI                    | No  |
| McAnulty 2009    | RCT                                         | USA         | HIC   | NICU (1)  | NS                                                        | 107 (<29 wks, <1250g)                            | Yes | Yes | ENI, FCP, CI, EDI, FSI | No  |
| McAnulty 2010    | RCT (long term extension of Als 1994)       | USA         | HIC   | NICU (1)  | 38 parents (M, F)                                         | 38 (≤29 wks, ≤1250g)                             | Yes | Yes | ENI, FCP, CI, EDI, FSI | No  |
| McAnulty 2013    | RCT (long term extension of Als 2011)       | USA         | HIC   | NICU (1)  | 23 parents (M, F)                                         | 23 (29-33 wks, NS)                               | Yes | Yes | ENI, FCP, CI, EDI, FSI | No  |
| McLean 2022      | RCT (cluster)                               | Canada      | HIC   | NICU (12) | 126 M                                                     | 126 (<33 wks; NS)                                | Yes | Yes | ENI, FCP, CI, EDI, FSI | No  |
| Melnyk 2001      | RCT (pilot)                                 | USA         | HIC   | NICU (1)  | 42 M                                                      | 42 (<37 wks, NS)                                 | Yes | No  | EDI                    | Yes |
| Melnyk 2006      | RCT                                         | USA         | HIC   | NICU (2)  | 414 caregivers: 260 M + 154 F/other significant caregiver | 260 (26-34+6 wks, NS)                            | Yes | No  | EDI                    | Yes |
| Meyer 1994       | RCT                                         | USA         | HIC   | NICU (1)  | 34 parents (M, F)                                         | 34 (NS, ≤1500g)                                  | Yes | No  | EDI, FSI               | No  |
| Mianaei 2014     | RCT                                         | Iran        | L-MIC | NICU (2)  | 90 M                                                      | 90 (<34 wks, NS)                                 | Yes | No  | EDI                    | Yes |
| Milgrom 2010     | RCT                                         | Australia   | HIC   | NICU (2)  | 45 M                                                      | 52 (<30 wks, NS)                                 | Yes | No  | EDI                    | Yes |
| Milgrom 2013     | RCT                                         | Australia   | HIC   | NICU (2)  | 109 M                                                     | 123 (<30 wks, NS)                                | Yes | No  | EDI                    | Yes |
| Milgrom 2019     | RCT (long term extension of Milgrom 2013)   | Australia   | HIC   | NICU (2)  | 109 M                                                     | 123 (<30 wks, NS)                                | Yes | No  | EDI                    | Yes |
| Mousavi 2021     | RCT                                         | Iran        | L-MIC | NICU (2)  | 143 M                                                     | 143 (<37 wks, <2500g)                            | Yes | No  | EDI                    | No  |
| Murphy 2021      | RCT (cluster)                               | Canada      | HIC   | NICU (10) | 654 M                                                     | 765 (32-34+6wks; NS)                             | Yes | Yes | ENI, FCP, CI, EDI, FSI | No  |
| Myers 2015       | RCT (long term extension of Welch 2013)     | USA         | HIC   | NICU (1)  | 150 M                                                     | 150 (26-34+6 wks, NS)                            | Yes | Yes | ENI, EDI, FSI          | No  |
| Namprom 2018     | RCT                                         | Thailand    | U-MIC | NICU (2)  | 50 M                                                      | 50 (28-32 wks; <2500g)                           | Yes | No  | EDI                    | No  |
| Newnham 2009     | RCT                                         | Australia   | HIC   | NICU (1)  | 68 M                                                      | 68 (<37 wks, NS)                                 | Yes | No  | EDI                    | Yes |
| Nordhov 2010 (a) | RCT                                         | Norway      | HIC   | NICU (1)  | NS                                                        | 146 (NS, <2000g)                                 | Yes | Yes | EDI                    | Yes |
| Nordhov 2010 (b) | RCT                                         | Norway      | HIC   | NICU (1)  | 131 parents (M, F)                                        | 146 (NS, <2000g)                                 | Yes | Yes | EDI                    | Yes |

|                     |                                            |                                |       |                                         |                            |                                                  |     |     |                        |     |
|---------------------|--------------------------------------------|--------------------------------|-------|-----------------------------------------|----------------------------|--------------------------------------------------|-----|-----|------------------------|-----|
| Nordhov 2012        | RCT( long term extension of Kaaresen 2006) | Norway                         | HIC   | NICU (1)                                | 131 parents (M, F)         | 146 (<37 wks, <2000g) +75 term control newborns  | Yes | Yes | EDI                    | Yes |
| Northrup 2016       | RCT                                        | USA                            | HIC   | NICU (1)                                | 138 parents (M, F)         | NS (NS, ≤1000 g)                                 | No  | No  | FSI                    | No  |
| Nurcombe 1984       | RCT                                        | USA                            | HIC   | NICU (1)                                | NS                         | 74 (<37 wks, <2200g)                             | Yes | Yes | EDI                    | Yes |
| Oberg 2020          | RCT (secondary publication of Ustad 2016)  | Norway                         | HIC   | NICU (3)                                | NS                         | 153 (< 32 wks, NS)                               | Yes | No  | EDI                    | No  |
| O'Brien 2018        | RCT (cluster, multinational)               | Canada, Australia, New Zealand | HIC   | NICU (25: Canada 18, Australia 6, NZ 1) | 1443 M                     | 1786 (≤33 wks, NS)                               | Yes | Yes | ENI, FCP, CI, EDI, FSI | No  |
| Oehler 1990         | RCT                                        | USA                            | HIC   | NICU (1)                                | 31 siblings                | NS                                               | No  | No  | FCP                    | No  |
| Ohgi 2004           | RCT                                        | Japan                          | HIC   | NICU (1)                                | NS (M)                     | 24 (NS, <2500g)                                  | No  | Yes | EDI                    | Yes |
| Olafsen 2008        | RCT (long term extension of Kaaresen 2006) | Norway                         | HIC   | NICU (1)                                | 146 parents (M, F)         | 146 (<37 wks, <2000 g) +75 term control newborns | Yes | Yes | EDI                    | Yes |
| Örtenstrand 2010    | RCT                                        | Sweden                         | HIC   | NICU (2)                                | NS                         | 366 (<37 wks; NS)                                | Yes | No  | ENI                    | No  |
| Oyekunle 2021       | RCT (cluster)                              | Nigeria                        | L-MIC | NCU (2)                                 | 41 M                       | 41 (NS, NS)                                      | Yes | No  | EDI, FSI               | No  |
| Peters 2009         | RCT                                        | Canada                         | HIC   | NICU (1)                                | NS                         | 111 (<32 wks, 500-1250g)                         | Yes | Yes | ENI, FCP, CI, EDI, FSI | No  |
| Petteys 2018        | RCT (pilot)                                | USA                            | HIC   | NICU (1)                                | 55 parents (M, F)          | 55 (<35 wks, NS)                                 | Yes | Yes | EDI                    | No  |
| Pillai 2021         | RCT                                        | India                          | L-MIC | NICU (1)                                | 116 parents (M, F)         | 147 (28-33 wks, >750g)                           | Yes | Yes | EDI                    | No  |
| Pineda 2021         | RCT                                        | USA                            | HIC   | NICU (1)                                | 70 parents (M, F)          | 70 (≤32 wks, NS)                                 | Yes | Yes | EDI                    | No  |
| Pisoni 2021         | RCT                                        | Italy                          | HIC   | NICU (1)                                | 42 families                | 42 (≤32 wks, ≤1500g)                             | Yes | Yes | EDI                    | No  |
| Porges 2019         | RCT                                        | USA                            | HIC   | NICU (1)                                | 115 M                      | 150 (26-34 wks, NS)                              | Yes | Yes | ENI, EDI, FSI          | No  |
| Rajabi 2021         | RCT                                        | Iran                           | L-MIC | NICU (1)                                | 80 M                       | NS (34-36 wks, NS)                               | Yes | Yes | EDI                    | No  |
| Ravn 2011           | RCT                                        | Norway                         | HIC   | NICU (1)                                | 236 parents (118 M, 118 F) | 118 (30-36 wks, NS)                              | Yes | Yes | EDI                    | Yes |
| Ravn 2012 (a)       | RCT                                        | Norway                         | HIC   | NICU (1)                                | 106 M                      | 118 (30-36wks, NS)                               | Yes | Yes | EDI                    | Yes |
| Ravn 2012 (b)       | RCT                                        | Norway                         | HIC   | NICU (1)                                | 82 F                       | 118 (30-36 wks, NS)                              | Yes | Yes | EDI                    | Yes |
| Rostami 2020        | RCT (cluster)                              | Iran                           | L-MIC | NICU (4)                                | 72 parents (M, F)          | 72 (28-34 wks, <2500g)                           | No  | No  | EDI                    | No  |
| Russel 2021         | RCT                                        | USA                            | HIC   | NICU (1)                                | 97 parents (67 M, 30 F)    | 100 (≥28 wks, NS)                                | Yes | No  | EDI, FSI               | No  |
| Sajadi 2020         | RCT                                        | Iran                           | L-MIC | NICU (1)                                | 40 M                       | NS (26-37 wks, < 2500 g)                         | Yes | No  | EDI                    | No  |
| Schroeder 2006      | RCT (mulicenter)                           | USA                            | HIC   | NICU (2)                                | 16 M                       | 16 (<28 wks, <1500g)                             | Yes | No  | EDI                    | No  |
| Schwab 1983         | RCT                                        | USA                            | HIC   | NICU (1)                                | 16 siblings                | 13                                               | Yes | No  | FCP                    | No  |
| Seiiedi-Biarag 2021 | RCT                                        | Iran                           | L-MIC | NICU (1)                                | 66 M                       | NS (28-33 wks, NS)                               | Yes | Yes | EDI, FSI               | No  |
| Seyedrasooli 2020   | RCT                                        | Iran                           | L-MIC | NICU (1)                                | 50 M                       | 50 (NS, NS)                                      | Yes | No  | EDI                    | No  |
| Shaw 2013           | RCT                                        | USA                            | HIC   | NICU (4)                                | 105 M                      | NS (25-34 wks, >600g)                            | Yes | Yes | EDI                    | No  |
| Shaw 2014           | RCT (long term extension of Shaw 2013)     | USA                            | HIC   | NICU (4)                                | 105 M                      | NS (25-34 wks, > 600g)                           | Yes | Yes | EDI                    | No  |

|                          |                                                    |             |       |                               |                                                                                  |                               |     |     |                        |     |
|--------------------------|----------------------------------------------------|-------------|-------|-------------------------------|----------------------------------------------------------------------------------|-------------------------------|-----|-----|------------------------|-----|
| Silverstein 2011         | RCT (pilot)                                        | USA         | HIC   | NICU (2)                      | 50 M                                                                             | NS ( $\leq 33$ wks, NS)       | Yes | Yes | EDI                    | Yes |
| Synnes 2022              | RCT (cluster, long term extension of O'Brien 2018) | Canada      | HIC   | NICU (10)                     | NS                                                                               | 445 ( $< 29$ wks, NS)         | Yes | Yes | ENI, FCP, CI, EDI, FSI | No  |
| Tavasolnia 2017          | RCT                                                | Iran        | L-MIC | NICU (1) + maternity ward (1) | 84 M                                                                             | NS                            | Yes | No  | EDI                    | No  |
| Teti 2009                | RCT                                                | USA         | HIC   | NICU (2)                      | 138 M                                                                            | 138 ( $< 37$ wks, NS)         | No  | No  | EDI                    | Yes |
| Turan 2008               | RCT                                                | Turkey      | U-MIC | NICU (1)                      | 40 M                                                                             | 40 (24-37 wks, NS)            | Yes | No  | CI, EDI                | No  |
| Twohig 2021              | RCT                                                | Ireland     | HIC   | NICU (1)                      | 80 M                                                                             | 98 ( $\leq 32$ wks, NS)       | Yes | Yes | EDI                    | No  |
| Ustad 2016               | RCT                                                | Norway      | HIC   | NICU (3)                      | 153 parents (M, F)                                                               | 153 ( $< 32$ wks, NA)         | Yes | No  | EDI                    | No  |
| Van der Pal 2007         | 2 consecutive RCT                                  | Netherlands | HIC   | NICU (2)                      | 168 parents (M, F)                                                               | 168 ( $< 32$ wks, NS)         | Yes | Yes | ENI, FCP, CI, EDI, FSI | No  |
| Van der Pal 2008 (a)     | RCT (long term extension of Van der Pal 2007)      | Netherlands | HIC   | NICU (2)                      | 144 parents (M, F)                                                               | 168 ( $< 32$ wks, NS)         | Yes | Yes | ENI, FCP, CI, EDI, FSI | No  |
| Van der Pal 2008 (b)     | RCT (long term extension of Van der Pal 2007)      | Netherlands | HIC   | NICU (2)                      | 144 parents (M, F)                                                               | 168 ( $< 32$ wks; NS)         | Yes | Yes | ENI, FCP, CI, EDI, FSI | No  |
| Verkerk 2012             | RCT (long term extension of Koldewijn 2009)        | Netherlands | HIC   | NICU (7)                      | NS                                                                               | 176 ( $< 32$ wks, $< 1500$ g) | Yes | Yes | EDI                    | Yes |
| Verma 2017               | RCT                                                | India       | L-MIC | NICU (1)                      | NS (2-3 caregivers per newborn including mothers/fathers/grandparents/relatives) | 295 (preterm and term, NS)    | Yes | Yes | EDI                    | No  |
| Viera 2010               | RCT                                                | Chile       | L-MIC | NICU (1)                      | 58 M                                                                             | 59 ( $< 37$ wks, NS)          | Yes | Yes | EDI                    | No  |
| Villamizar-Carvajal 2018 | RCT                                                | Colombia    | U-MIC | NICU (3)                      | 66 M                                                                             | NS ( $< 34$ wks, NS)          | Yes | No  | EDI                    | Yes |
| Vonderheid 2016          | RCT (secondary publication of White-Traut 2014)    | USA         | HIC   | NICU (2)                      | 147 M                                                                            | 147 (29-34 wks, NS)           | Yes | No  | EDI, FSI               | Yes |
| Vonderheid 2020          | RCT (secondary publication of White-Traut 2015)    | USA         | HIC   | NICU (1) + maternity ward (2) | 121 M                                                                            | 121 (29-34 wks, NS)           | Yes | No  | EDI, FSI               | Yes |
| Weis 2013                | RCT                                                | Denmark     | HIC   | NICU (1)                      | 134 parents (75 M, 59 F)                                                         | 104 ( $\leq 34$ wks, NS)      | Yes | Yes | CI, EDI                | No  |
| Welch 2013               | RCT                                                | USA         | HIC   | NICU (1)                      | 230 parents (115 M, 115 F)                                                       | 150 (26-35 wks, NS)           | Yes | Yes | ENI, EDI, FSI          | No  |
| Welch 2014               | RCT (long term extension of Welch 2013)            | USA         | HIC   | NICU (1)                      | 115 M                                                                            | 150 (26-34+6 wks, NS)         | Yes | Yes | ENI, EDI, FSI          | No  |
| Welch 2015               | RCT (long term extension of Welch 2013)            | USA         | HIC   | NICU (1)                      | 150 M                                                                            | 150 (26-34+6 wks, NS)         | Yes | Yes | ENI, EDI, FSI          | No  |
| Welch 2016               | RCT (long term extension of Welch 2013)            | USA         | HIC   | NICU (1)                      | 115 M                                                                            | 150 (26-34 wks, NS)           | Yes | Yes | ENI, EDI, FSI          | No  |
| Welch 2017               | RCT (long term extension of Welch 2013)            | USA         | HIC   | NICU (1)                      | NS                                                                               | 150 (26-34 wks, NS)           | Yes | Yes | ENI, EDI, FSI          | No  |

|                  |                                                 |        |       |          |                    |                        |     |     |                        |     |
|------------------|-------------------------------------------------|--------|-------|----------|--------------------|------------------------|-----|-----|------------------------|-----|
| Welch 2020 (a)   | RCT (long term extension of Welch 2013)         | USA    | HIC   | NICU (1) | 115 M              | 150 (26- 34 wks, NS)   | Yes | Yes | ENI, EDI, FSI          | No  |
| Welch 2020 (b)   | RCT (long term extension of Welch 2013)         | USA    | HIC   | NICU (1) | 150 M              | 150 (26-34 wks, NS)    | Yes | Yes | ENI, EDI, FSI          | No  |
| Westrup 2000     | RCT                                             | Sweden | HIC   | NICU (1) | 25 parents (M, F)  | 25 (<32 wks, NS)       | Yes | Yes | ENI, FCP, CI, EDI, FSI | No  |
| Westrup 2004     | RCT (long term extension of Westrup 2000)       | Sweden | HIC   | NICU (1) | NS                 | 41(<32 wks, NS)        | Yes | Yes | ENI, FCP, CI, EDI, FSI | No  |
| Whitehill 2021   | RCT                                             | USA    | HIC   | NICU (1) | 70 parents (M, F)  | 70 (≤ 32 wks, NS)      | Yes | Yes | EDI                    | No  |
| White-Traut 1988 | RCT (multi-centered)                            | USA    | HIC   | NICU (4) | 26 M               | 26 (21-32 wks, NA)     | Yes | No  | EDI                    | Yes |
| White-Traut 2012 | RCT (single-centered)                           | USA    | HIC   | NICU (1) | 33 M               | 33 (28-35 wks, NA)     | Yes | No  | EDI                    | Yes |
| White-Traut 2013 | RCT                                             | USA    | HIC   | NICU (2) | 142 M              | 142 (29-34 wks, NS)    | Yes | No  | EDI, FSI               | Yes |
| White-Traut 2015 | RCT (secondary publication of White-Traut 2013) | USA    | HIC   | NICU (2) | 182 M              | 182 (29-34 wks, NS)    | Yes | No  | EDI, FSI               | Yes |
| Wu 2014          | RCT                                             | Taiwan | HIC   | NICU (3) | NS                 | 178 (<37 wks; <1800g)  | Yes | No  | EDI                    | Yes |
| Xie 2019         | RCT                                             | China  | U-MIC | NICU (1) | 162 M              | 162 (28-34 wks, NS)    | Yes | No  | EDI                    | Yes |
| Yilmaz 2021      | RCT                                             | Turkey | U-MIC | NICU (1) | 100 M              | NS (28-38 wks, >1500g) | Yes | No  | EDI                    | No  |
| Yu 2017          | RCT                                             | Taiwan | HIC   | NICU (3) | NS                 | 251 (<37 wks, <1500g)  | Yes | No  | ENI, EDI               | Yes |
| Zelkowitz 2011   | RCT                                             | Canada | HIC   | NICU (2) | 121 M              | 121 (NS, <1500g)       | Yes | Yes | EDI                    | Yes |
| Zeraati 2017     | RCT                                             | Iran   | L-MIC | NICU (1) | 60 M               | NS (30-36 wks, NS)     | Yes | No  | EDI                    | No  |
| Zhang 2018       | RCT (pilot)                                     | China  | U-MIC | NICU (1) | 120 parents (M, F) | 66 (< 37 wks, NS)      | Yes | No  | ENI, CI, EDI           | No  |

Notes: <sup>1</sup> Actors involved in the study and in the sample receiving and delivering the intervention; <sup>2</sup> RCTs do not difference between delivering and receiving an educational intervention, health professionals were involved only in educational intervention.

Abbreviations: CI=communication interventions; EDI=educational interventions; ENI=environmental interventions; F=fathers; HIC=high income country; L-MIC=lower-middle income country; FCC= family-centred care; FCP=family-centred policies; FSI=family support interventions; M=mothers; NS=not specified; NICU=neonatal intensive care unit; RCT=randomized controlled trial; U-MIC=upper-middle income country; UK=United Kingdom; USA=United States of America; WB=world bank; wks=weeks.



### Supplemental File 5. Classification of the identified FCC interventions

|                                                                                                                                                            | Overall<br>N=146<br>n (%) | MIC<br>N=28<br>n (%) | HIC<br>N=118<br>n (%) | p-value | RCTs<br>published up<br>to 2016<br>N=93<br>n (%) | RCTs published<br>after 2016<br>N=53<br>n (%) | p-value |
|------------------------------------------------------------------------------------------------------------------------------------------------------------|---------------------------|----------------------|-----------------------|---------|--------------------------------------------------|-----------------------------------------------|---------|
| <b>Single FCC intervention</b>                                                                                                                             |                           |                      |                       |         |                                                  |                                               |         |
| Educational interventions                                                                                                                                  | 86 (58.9)                 | 22 (78.6)            | 64 (54.2)             | 0.019   | 56 (60.2)                                        | 30 (56.6)                                     | 0.670   |
| Family support interventions                                                                                                                               | 2 (1.4)                   | 0 (0)                | 2 (1.7)               | >0.999  | 1 (1.1)                                          | 1 (1.9)                                       | >0.999  |
| Environmental interventions                                                                                                                                | 2 (1.4)                   | 0 (0)                | 2 (1.7)               | >0.999  | 1 (1.1)                                          | 1 (1.9)                                       | >0.999  |
| Communication interventions                                                                                                                                | 2 (1.4)                   | 0 (0)                | 2 (1.7)               | >0.999  | 2 (2.2)                                          | 0 (0)                                         | 0.534   |
| Family-centred policies                                                                                                                                    | 2 (1.4)                   | 0 (0)                | 2 (1.7)               | >0.999  | 2 (2.2)                                          | 0 (0)                                         | 0.534   |
| <b>Multiple FCC interventions</b>                                                                                                                          |                           |                      |                       |         |                                                  |                                               |         |
| Family support interventions &<br>Educational interventions &<br>Communication interventions &<br>Family-centred policies &<br>Environmental interventions | 24 (16.4)                 | 1 (3.6)              | 23 (19.5)             | 0.047   | 17 (18.3)                                        | 7 (13.2)                                      | 0.427   |
| Family support interventions &<br>Educational interventions                                                                                                | 10 (6.8)                  | 3 (10.7)             | 7 (5.9)               | 0.448   | 5 (5.4)                                          | 5 (9.4)                                       | 0.351   |
| Educational interventions &<br>Communication interventions                                                                                                 | 4 (2.7)                   | 1 (3.6)              | 3 (2.5)               | 0.578   | 3 (3.2)                                          | 1 (1.9)                                       | >0.999  |
| Educational interventions &<br>Environmental interventions                                                                                                 | 1 (0.7)                   | 0 (0)                | 1 (0.8)               | >0.999  | 0 (0)                                            | 1 (1.9)                                       | 0.363   |
| Family support interventions &<br>Educational interventions &<br>Communication interventions                                                               | 1 (0.7)                   | 0 (0)                | 1 (0.8)               | >0.999  | 0 (0)                                            | 1 (1.9)                                       | 0.363   |
| Educational interventions &<br>Communication interventions &<br>Environmental interventions                                                                | 1 (0.7)                   | 1 (3.6)              | 0 (0)                 | 0.192   | 0 (0)                                            | 1 (1.9)                                       | 0.363   |
| Family support interventions &<br>Educational interventions &<br>Environmental interventions                                                               | 11 (7.5)                  | 0 (0)                | 11 (9.3)              | 0.124   | 6 (6.5)                                          | 5 (9.4)                                       | 0.511   |
| <b>ANY Categories (single+multiple FCC<br/>intervention)*</b>                                                                                              |                           |                      |                       |         |                                                  |                                               |         |
| Educational interventions                                                                                                                                  | 138 (94.5)                | 28 (100.0)           | 110 (93.2)            | 0.335   | 87 (93.5)                                        | 51 (96.2)                                     | 0.737   |
| Family support interventions                                                                                                                               | 48 (32.9)                 | 4 (14.3)             | 44 (37.3)             | 0.035   | 29 (31.2)                                        | 19 (35.8)                                     | 0.760   |
| Environmental interventions                                                                                                                                | 39 (26.7)                 | 2 (7.1)              | 37 (31.4)             | 0.018   | 24 (25.8)                                        | 15 (28.3)                                     | 0.955   |
| Communication interventions                                                                                                                                | 32 (21.9)                 | 3 (10.7)             | 29 (24.6)             | 0.180   | 22 (23.7)                                        | 10 (18.9)                                     | 0.595   |
| Family-centred policies                                                                                                                                    | 26 (17.8)                 | 1 (3.6)              | 25 (21.2)             | 0.055   | 19 (20.4)                                        | 7 (13.2)                                      | 0.353   |

Notes: \* This section of the table shows the frequency of RCTs reporting each intervention category, one RCT can report more than one category. Abbreviations: FCC=family-centred care.
